# Supplementary material for: A phylogenomic framework for charting the diversity and evolution of giant viruses
Source: PubMed Central journal article supplement (PMC8575486; doi:10.1371/journal.pbio.3001430), 2021-10-27

**S1 Text for “A Phylogenomic Framework for Charting the Diversity and Evolution of Giant Viruses” by Aylward et al.**

Figure A. Major Capsid Protein GVOGm0003 phylogeny.

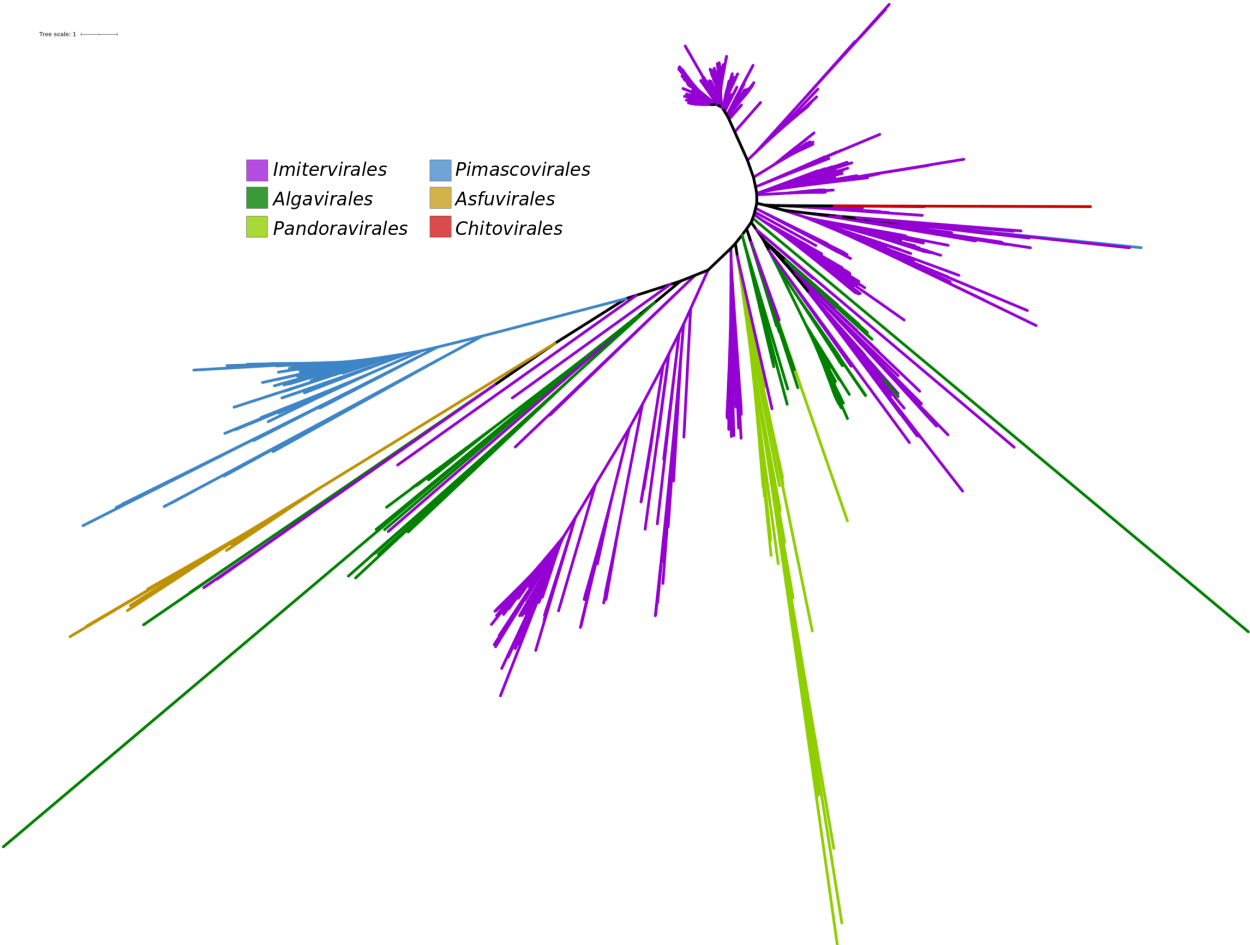

Figure B. Disulfide (thiol) oxidoreductase GVOGm0004 phylogeny.

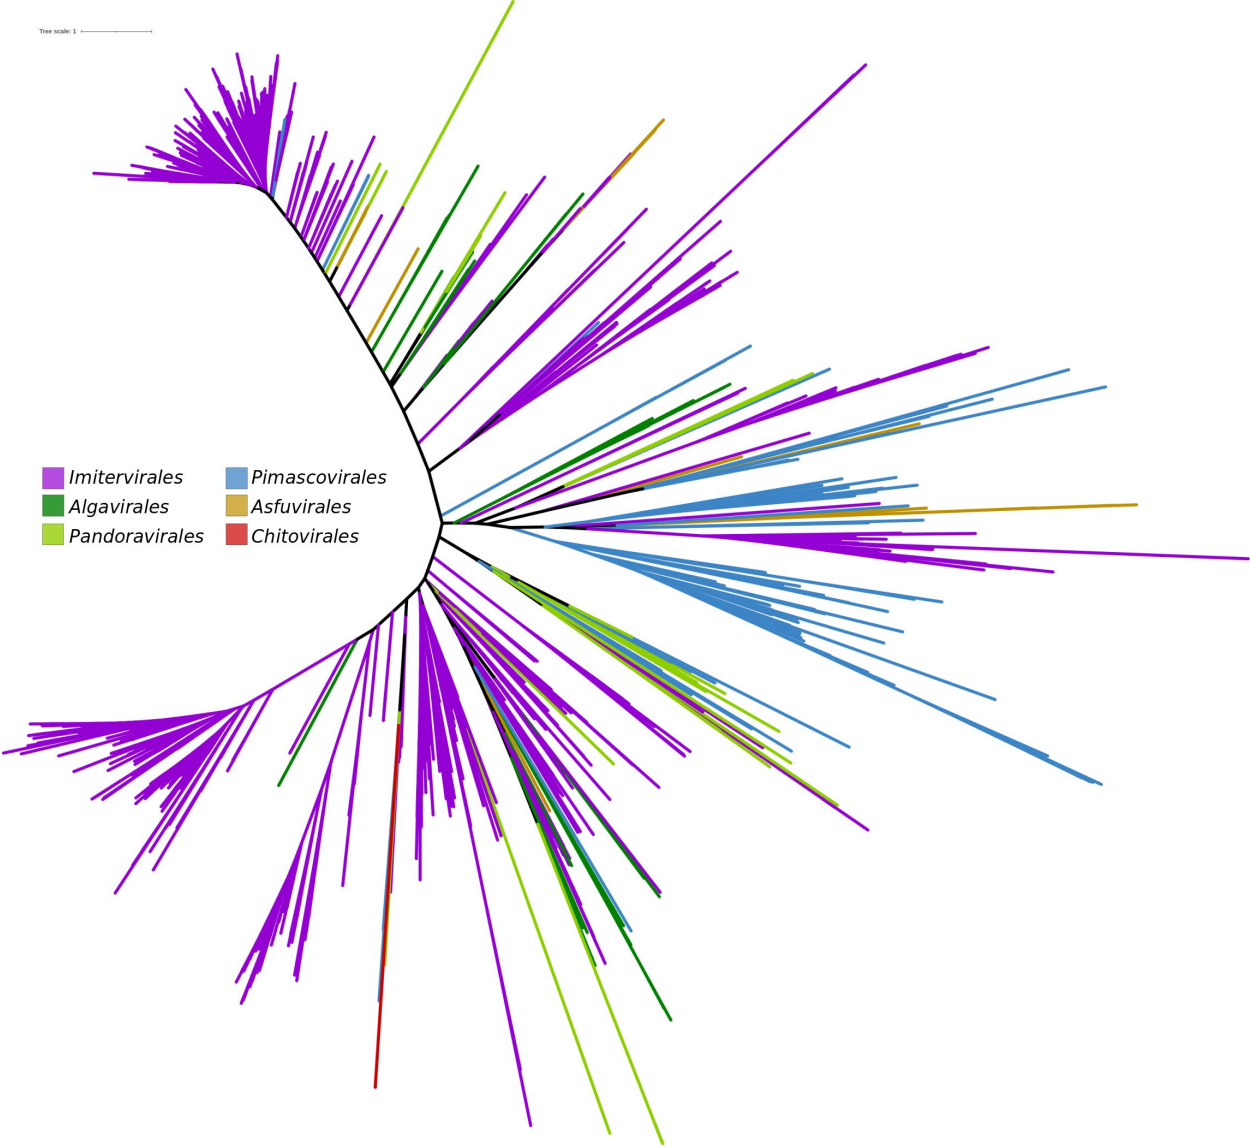

Figure C. Superfamily II helicase GVOGm0013 phylogeny.

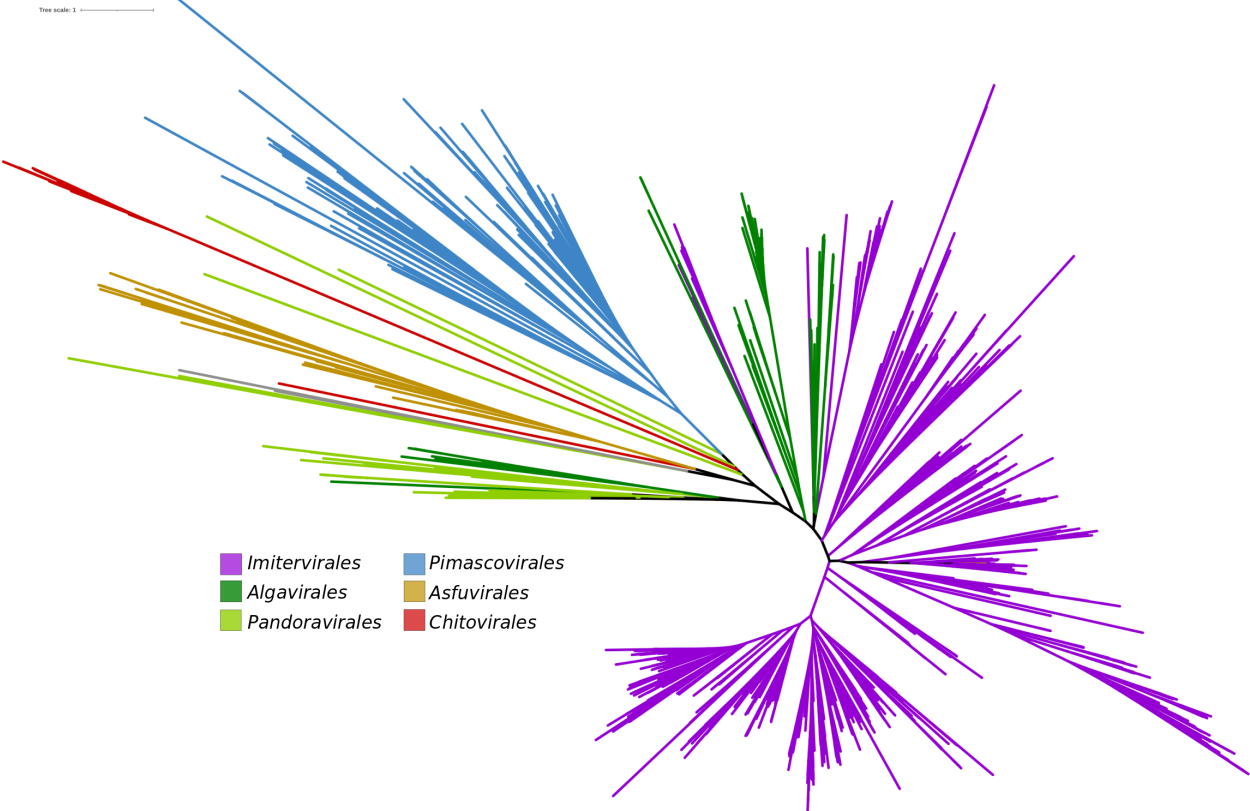



Figure D. Patatin phospholipase GVOGm0018 phylogeny.

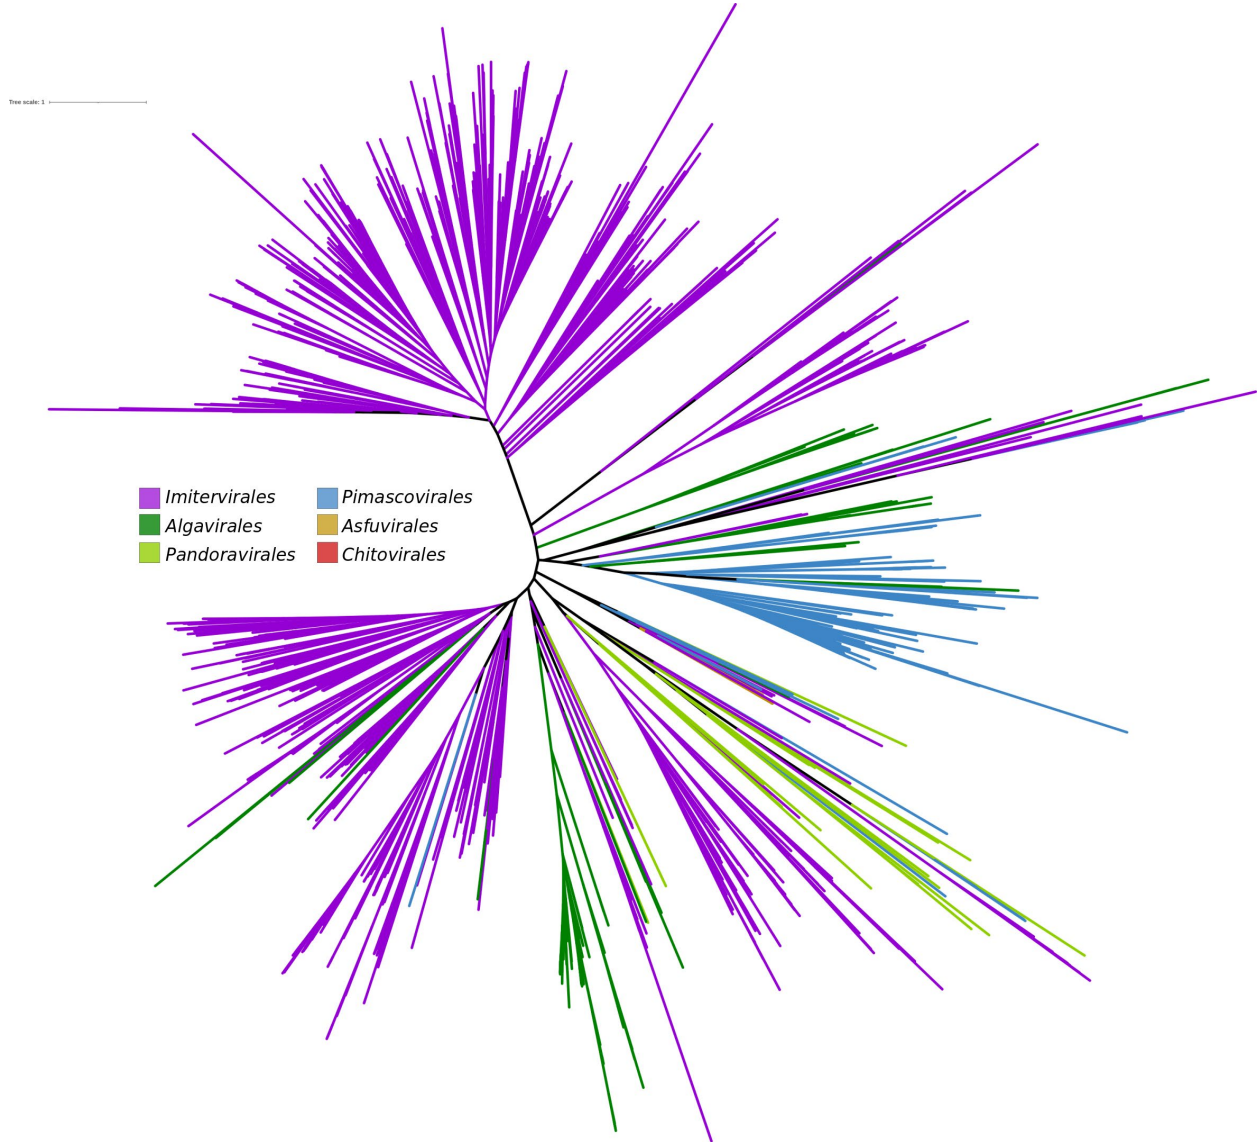

Figure E. DEAD/SNF2-like helicase GVOGm0020 phylogeny.

Tree scale: 1

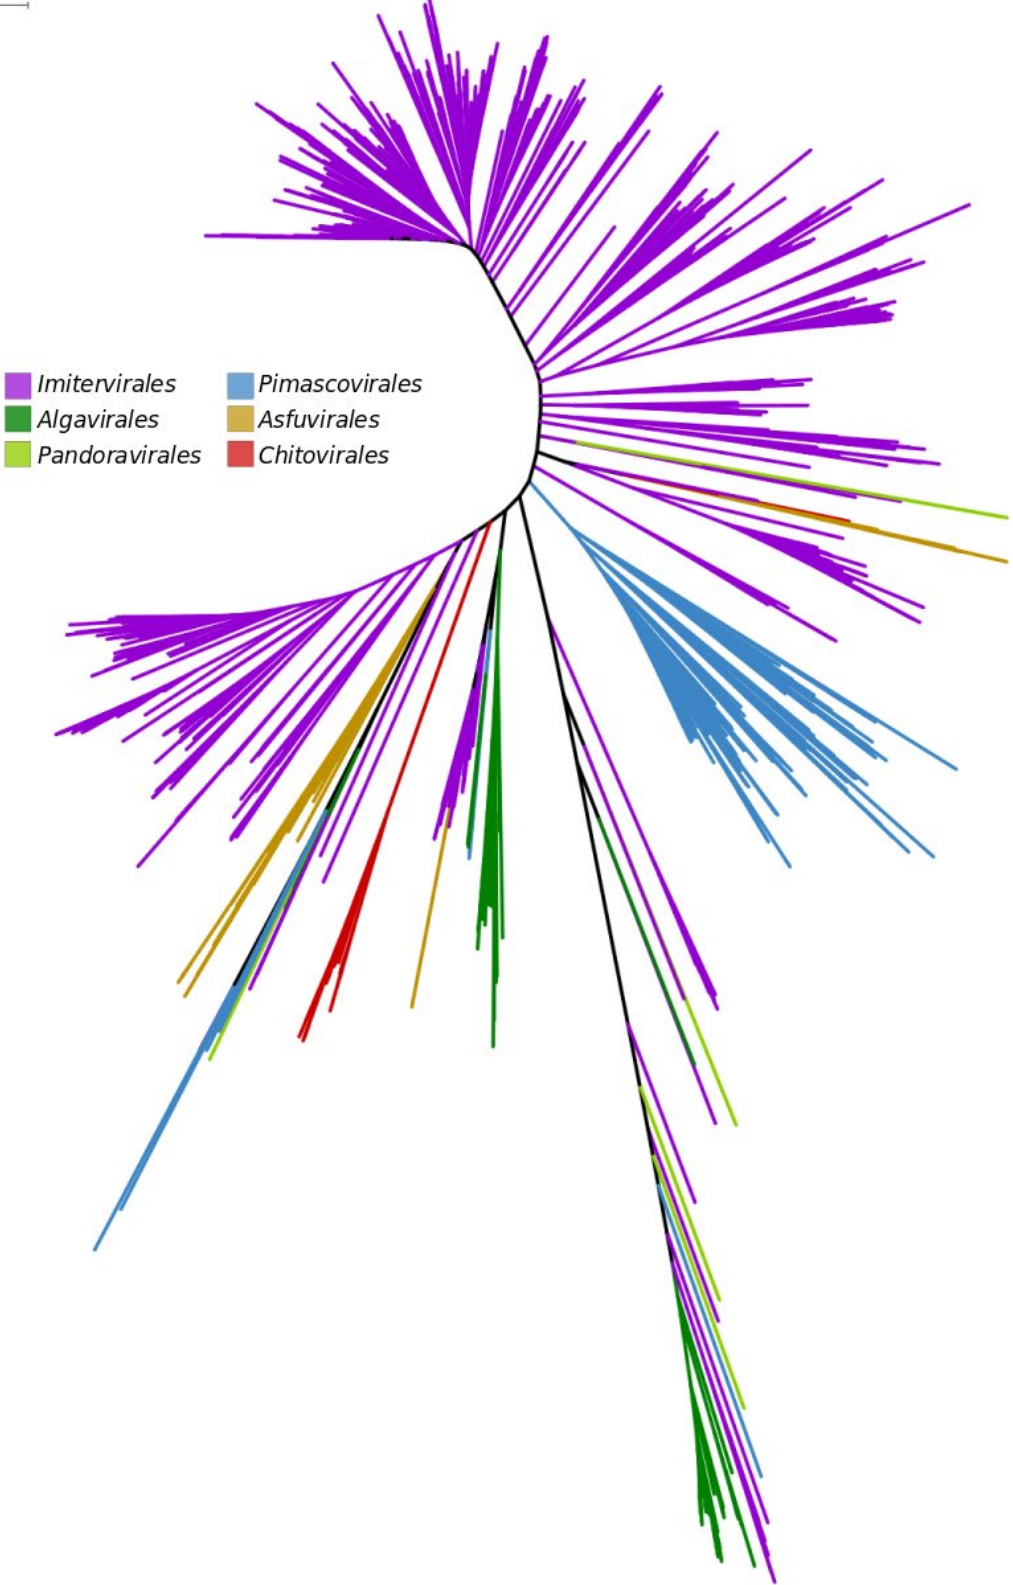

Figure F. DNA-directed RNA polymerase subunit beta (RNAPS) GVOGm0022 phylogeny.

Tree scale: 1

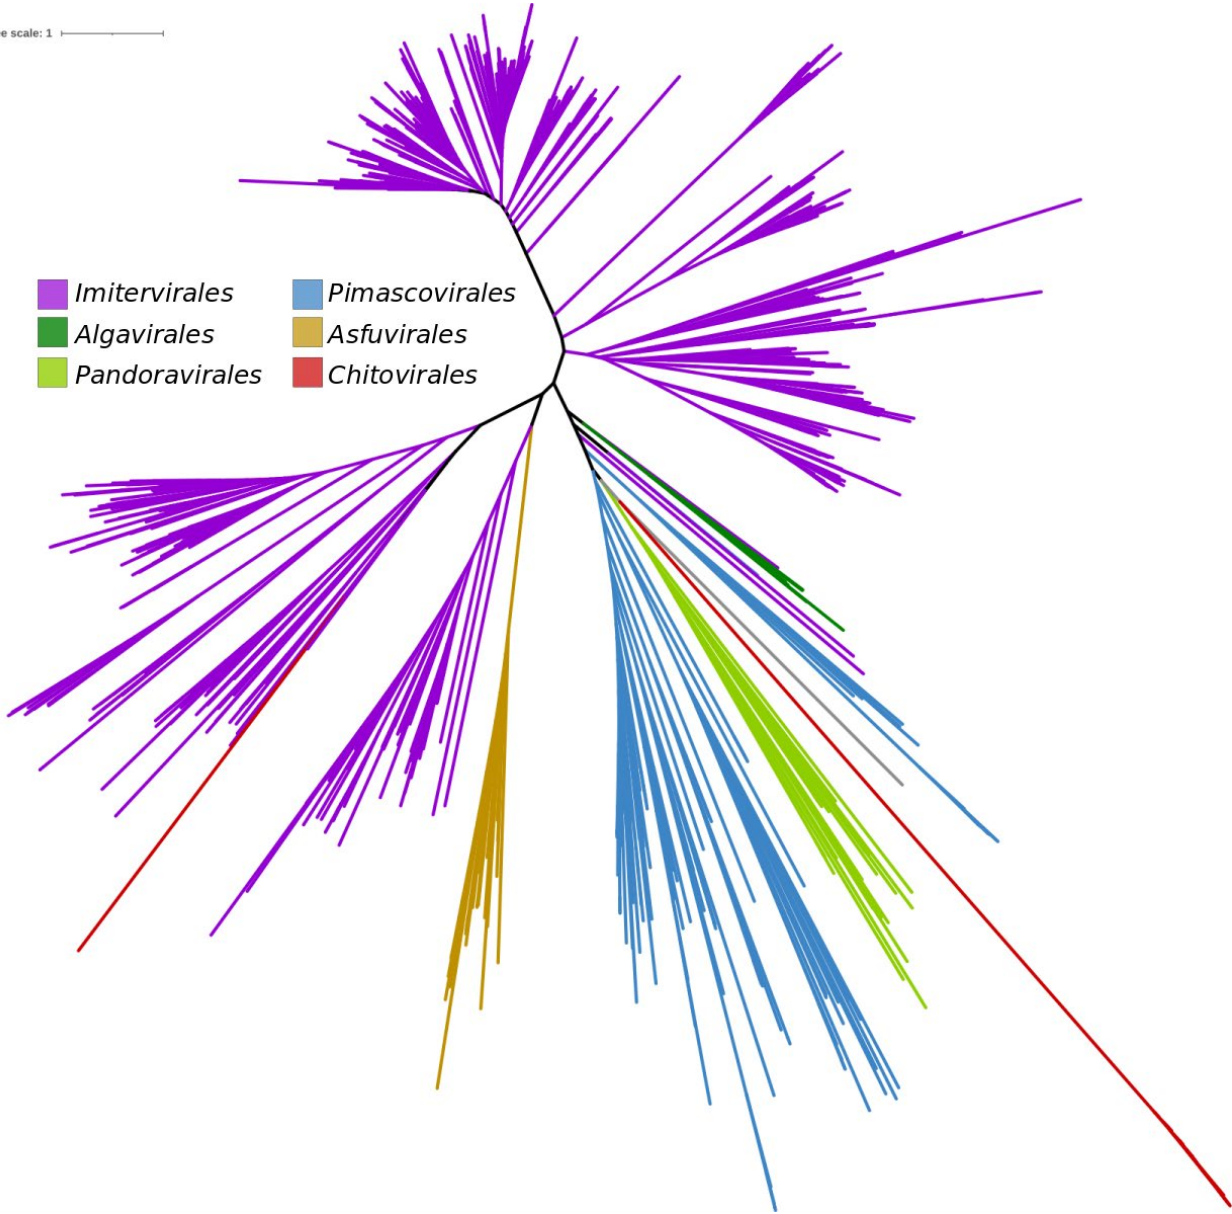

Figure G. DNA-directed RNA polymerase subunit alpha (RNAPL) GVOGm0023 phylogeny.

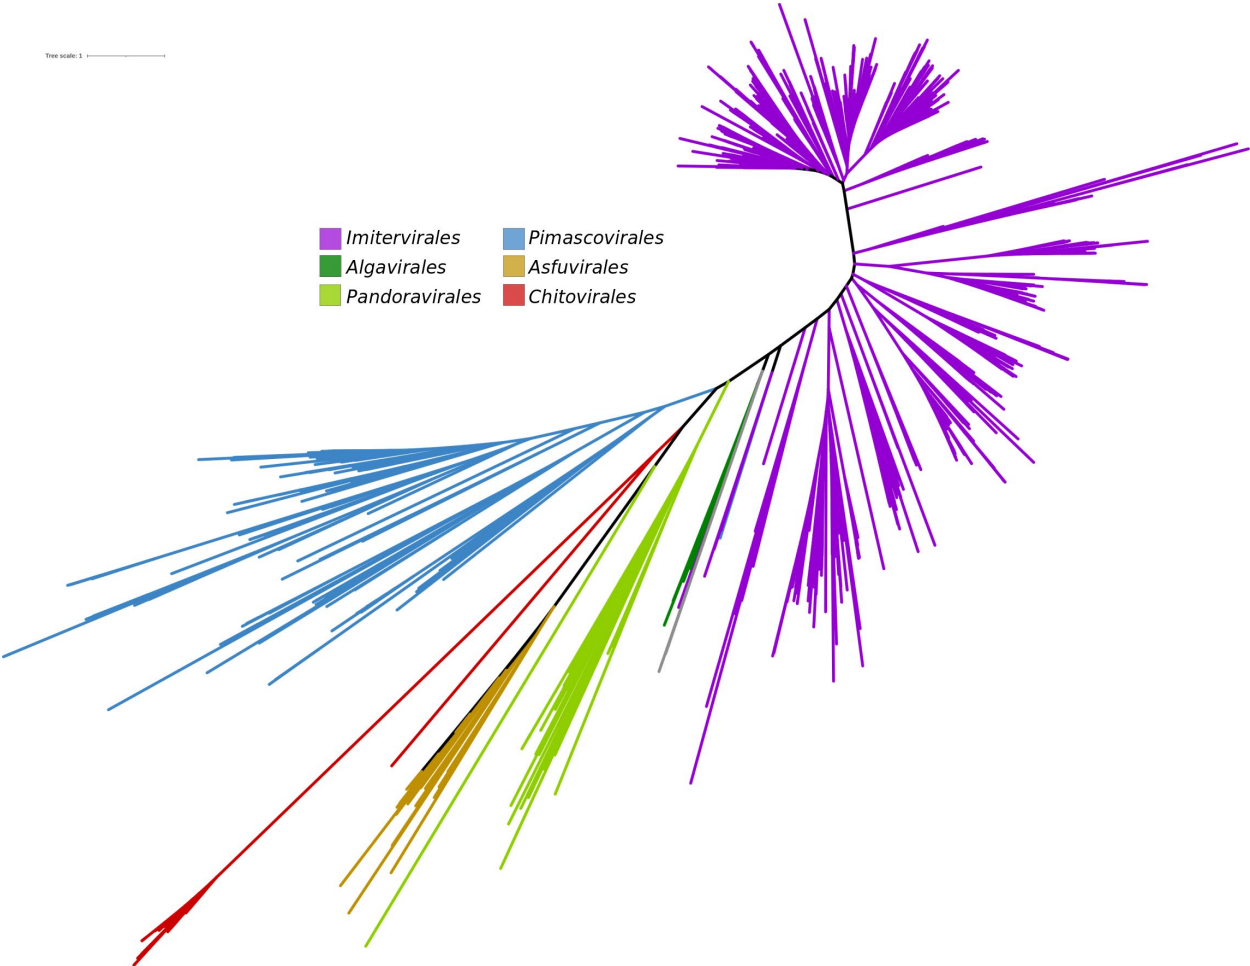

Figure H. mRNA capping enzyme GVOGm0036 phylogeny.

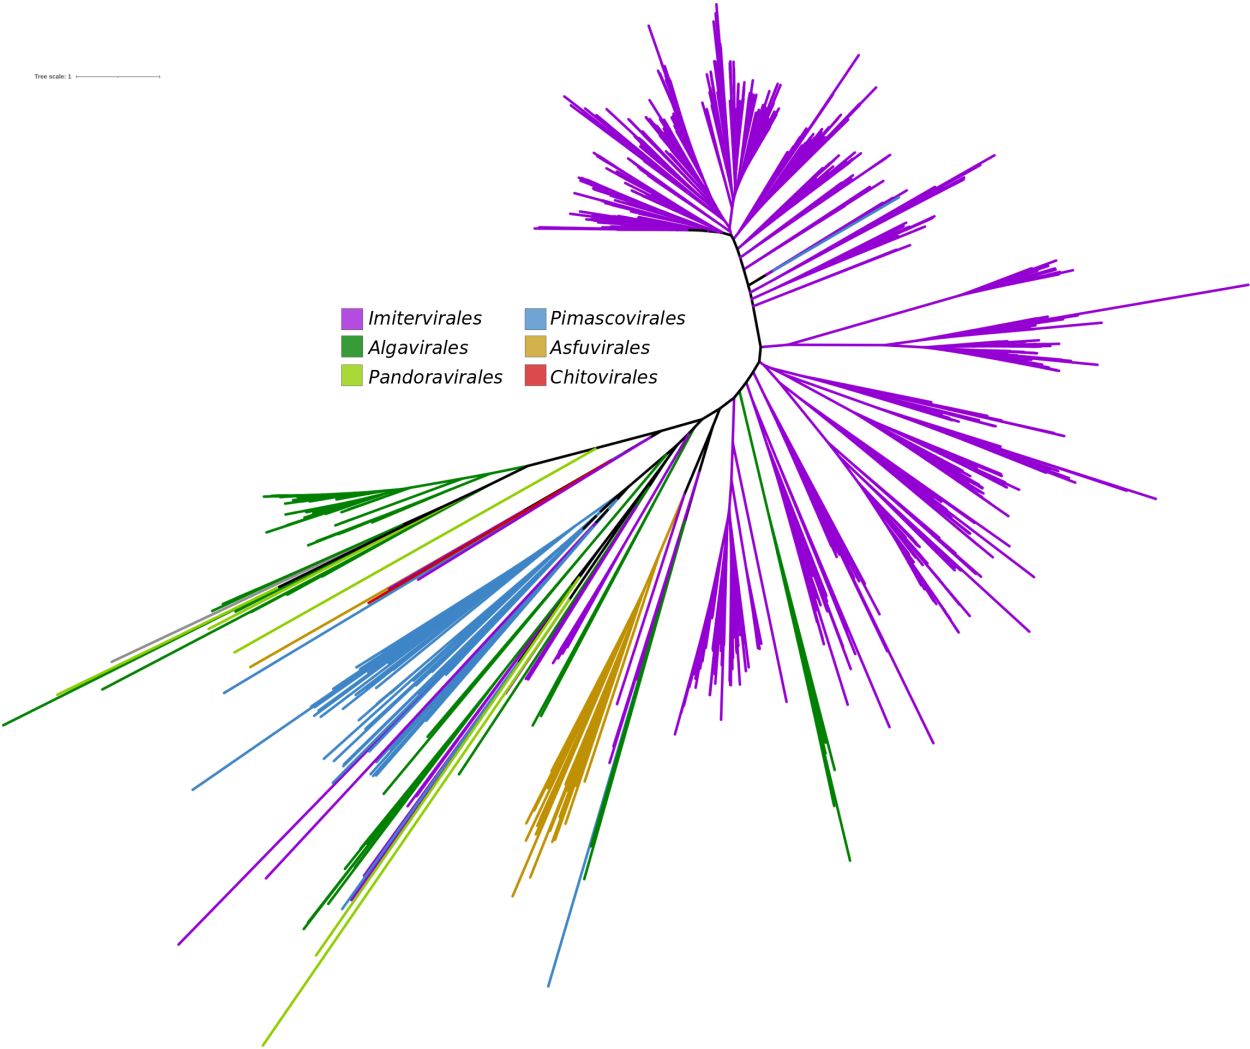



Figure I. DNA polymerase family B GVOGm0054 phylogeny.

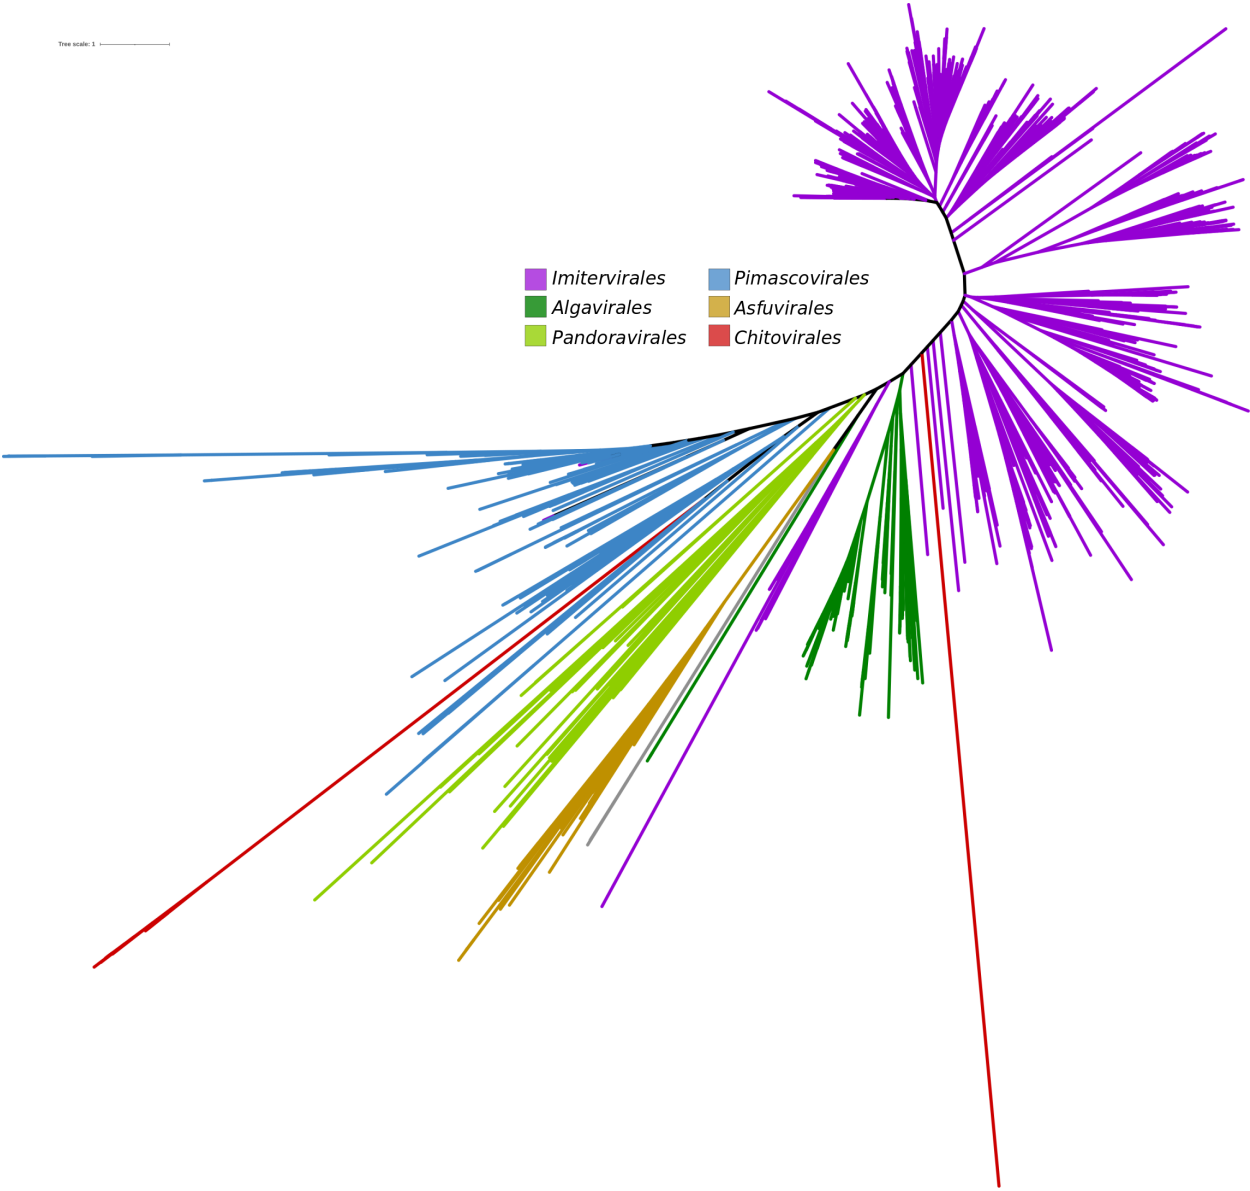

Figure J. TATA box binding protein (TBP) GVOGm0056 phylogeny.

Tree scale: 1

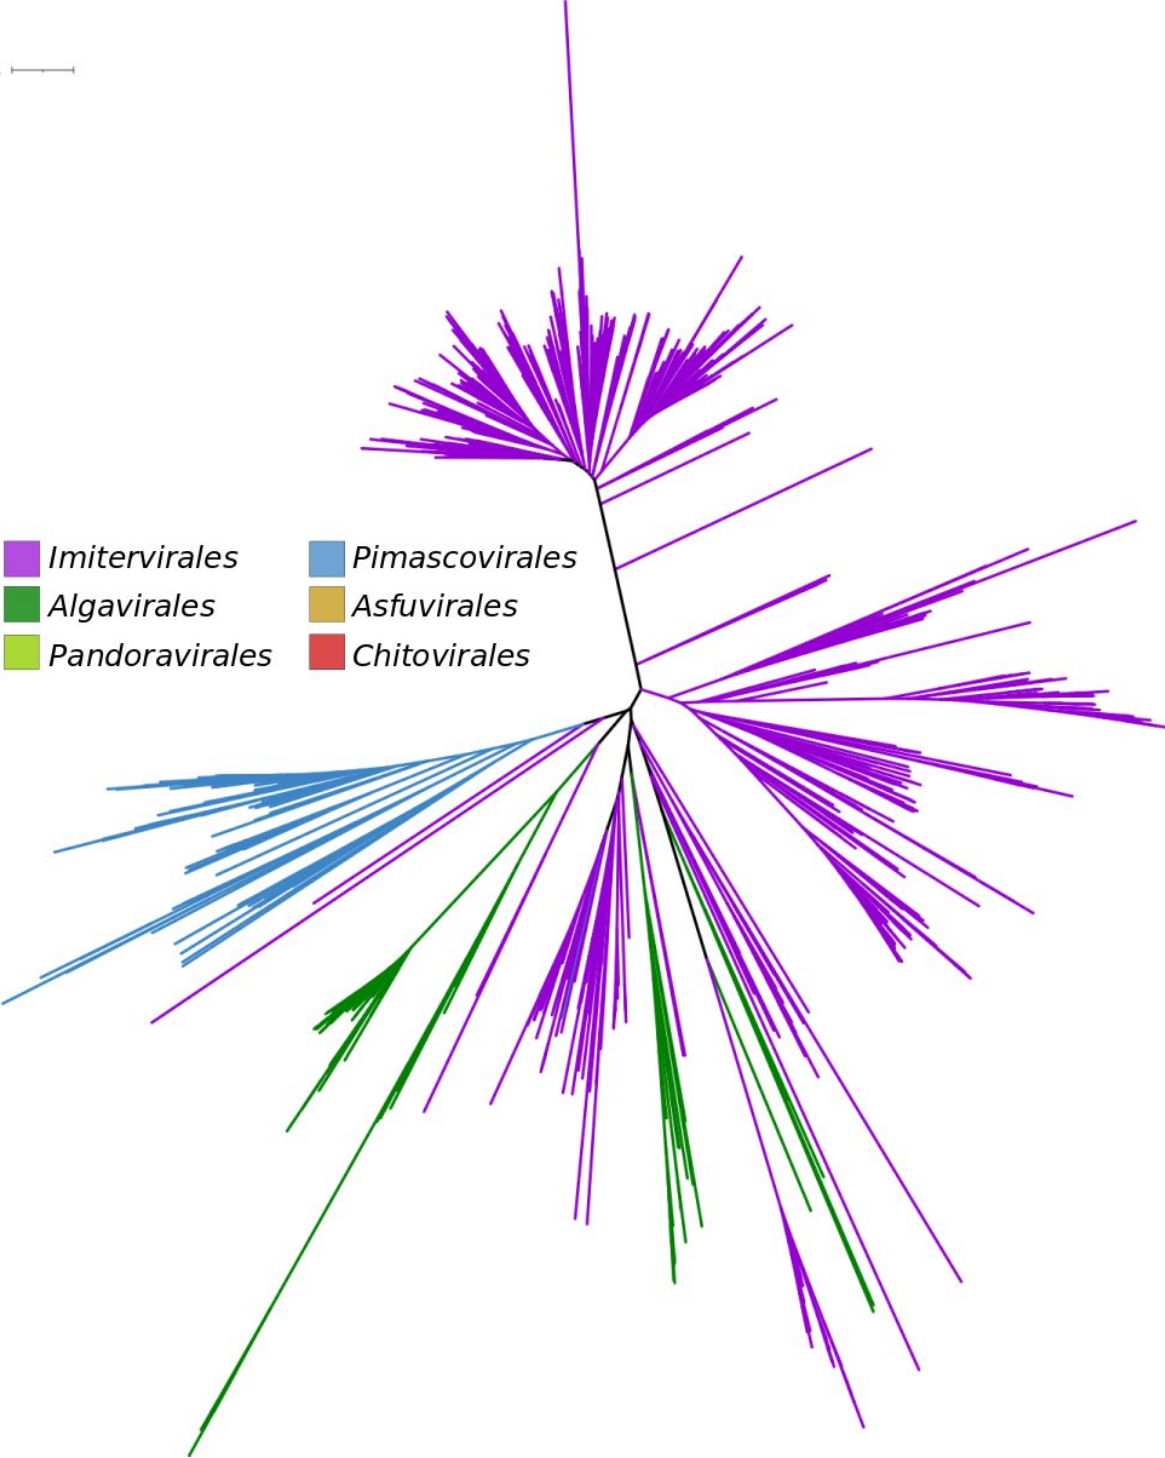

Figure K. Ribonucleoside diphosphate reductase, alpha subunit GVOGm0088 phylogeny.

Tree scale: 1

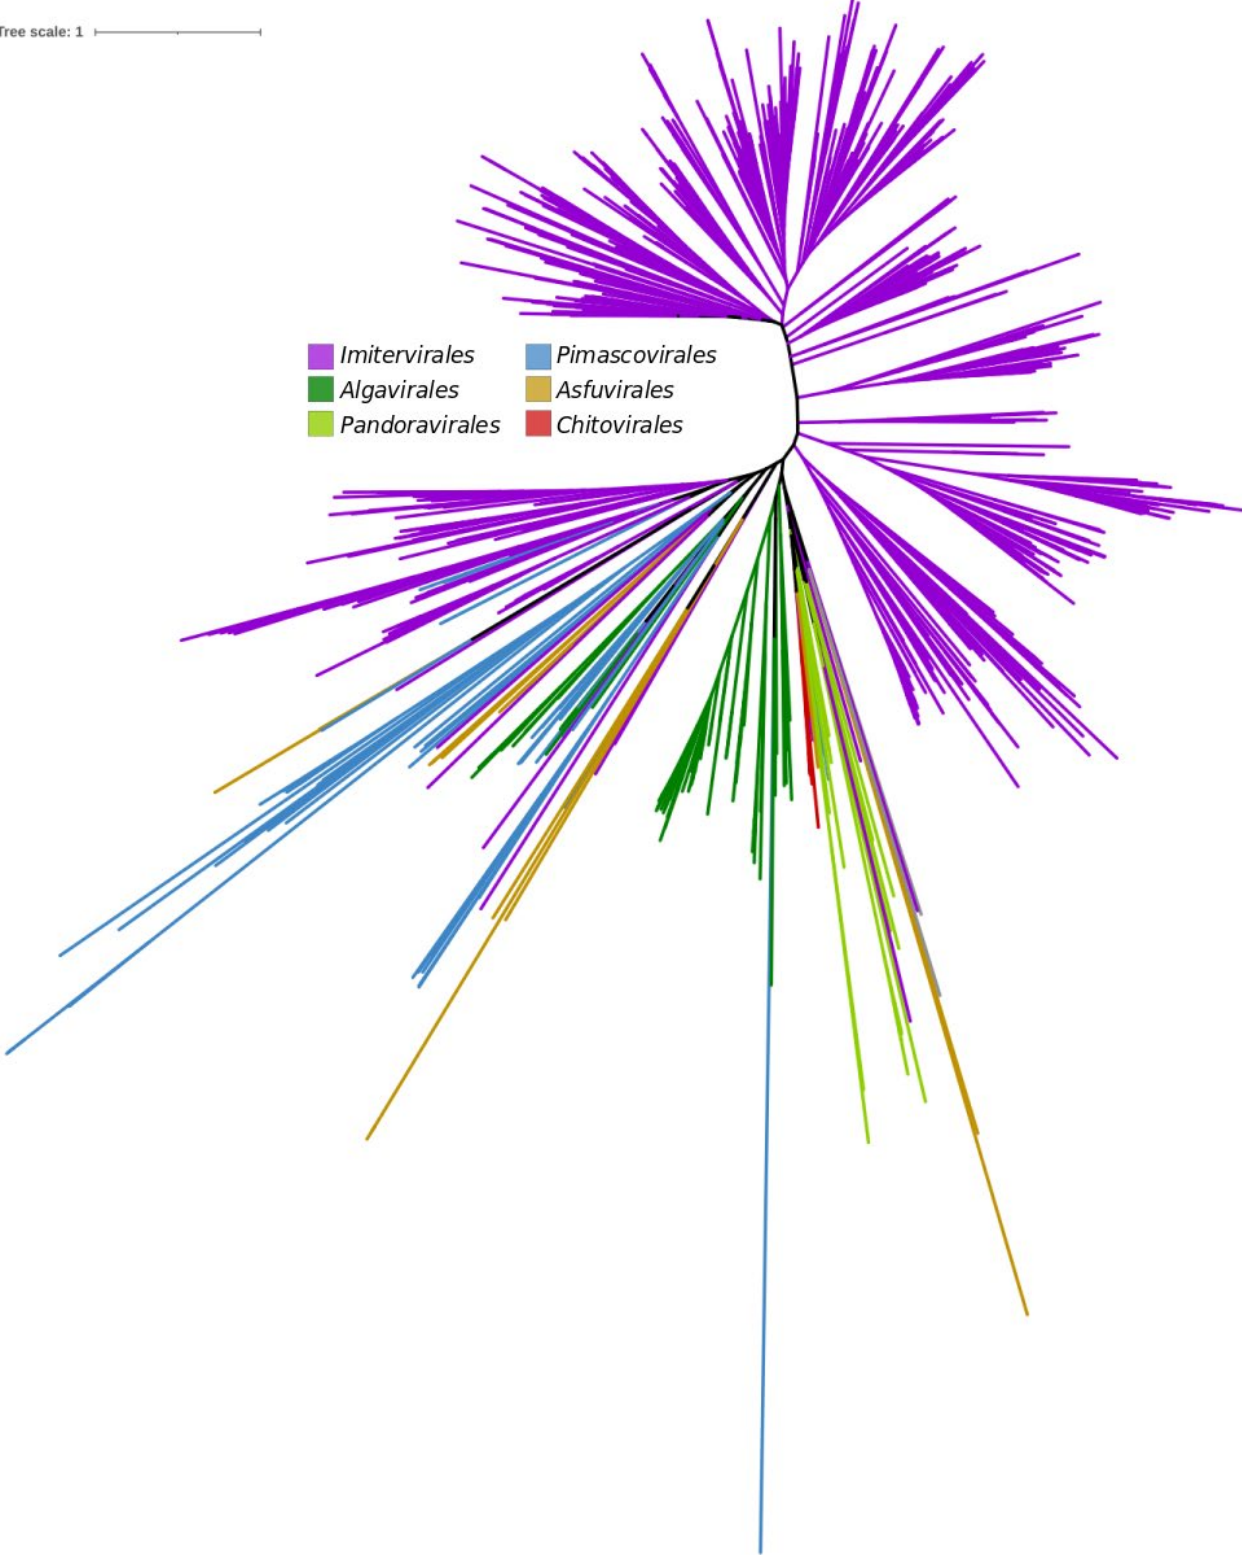



Figure L. D5-like helicase-primase GVOGm0095 phylogeny.

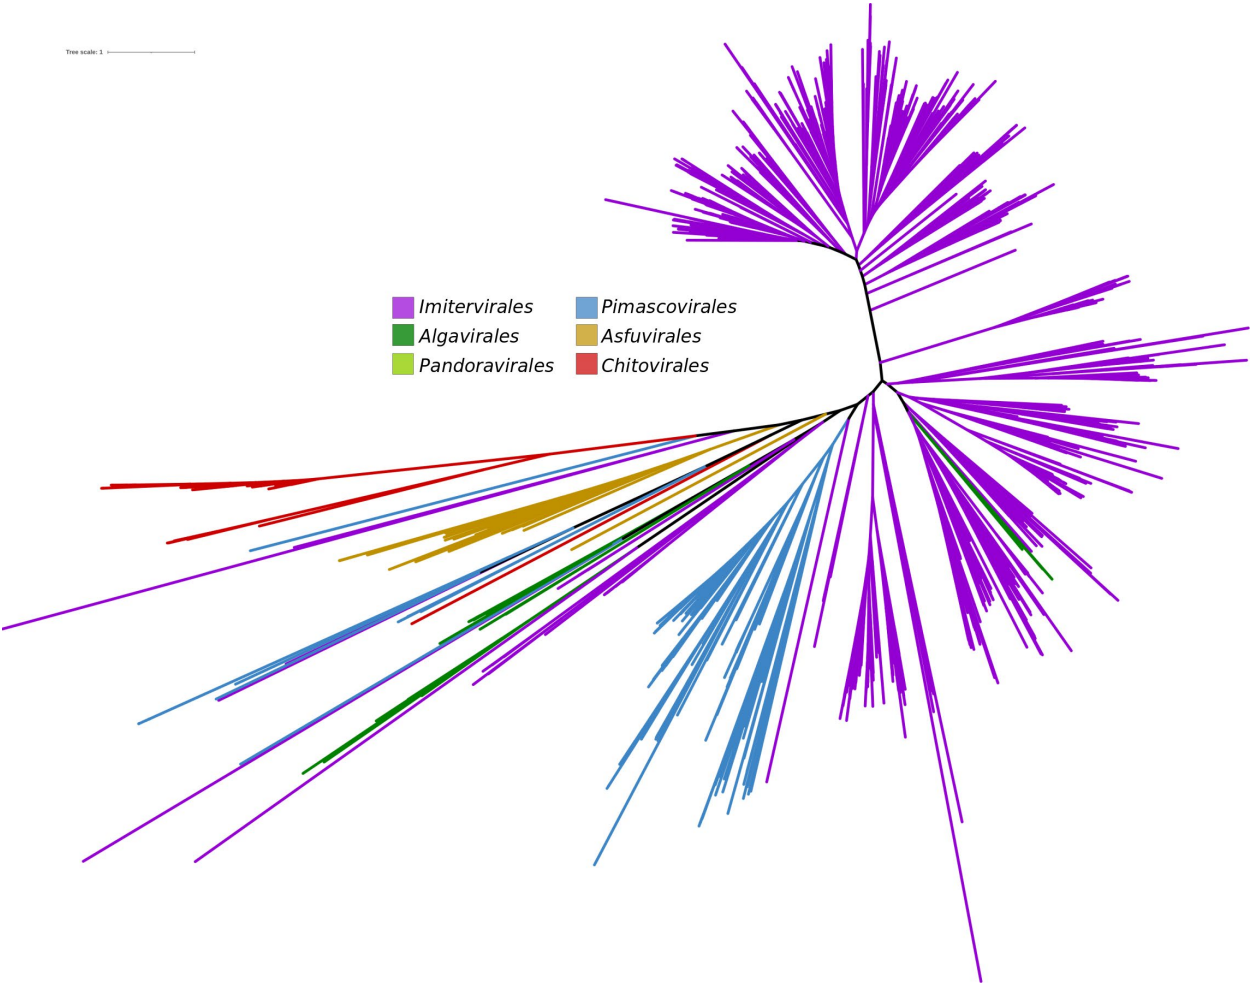

Figure M. Uncharacterized, C-terminal domain GVOGm0115 phylogeny.

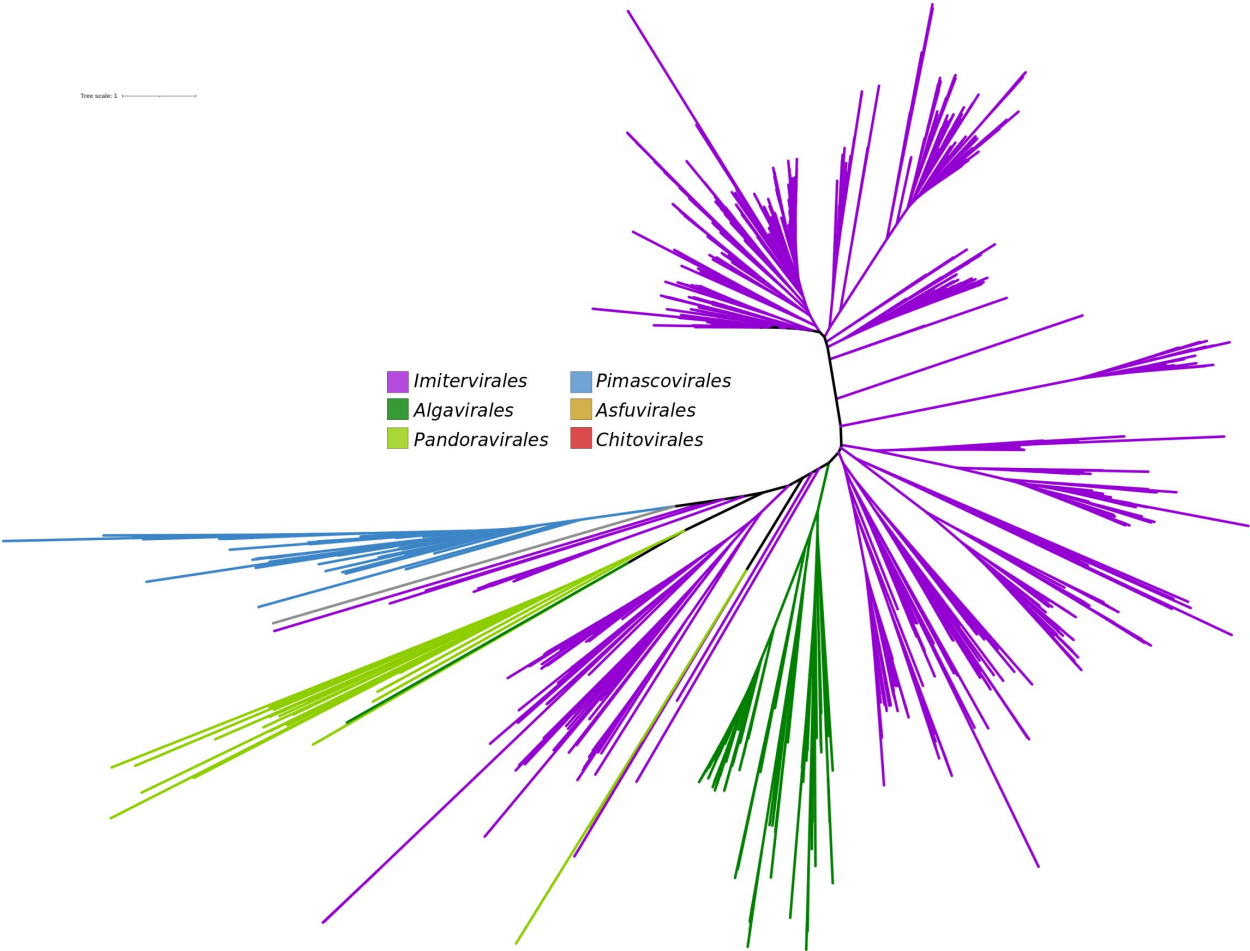

Figure N. Uncharacterized protein GVOGm0152 phylogeny.

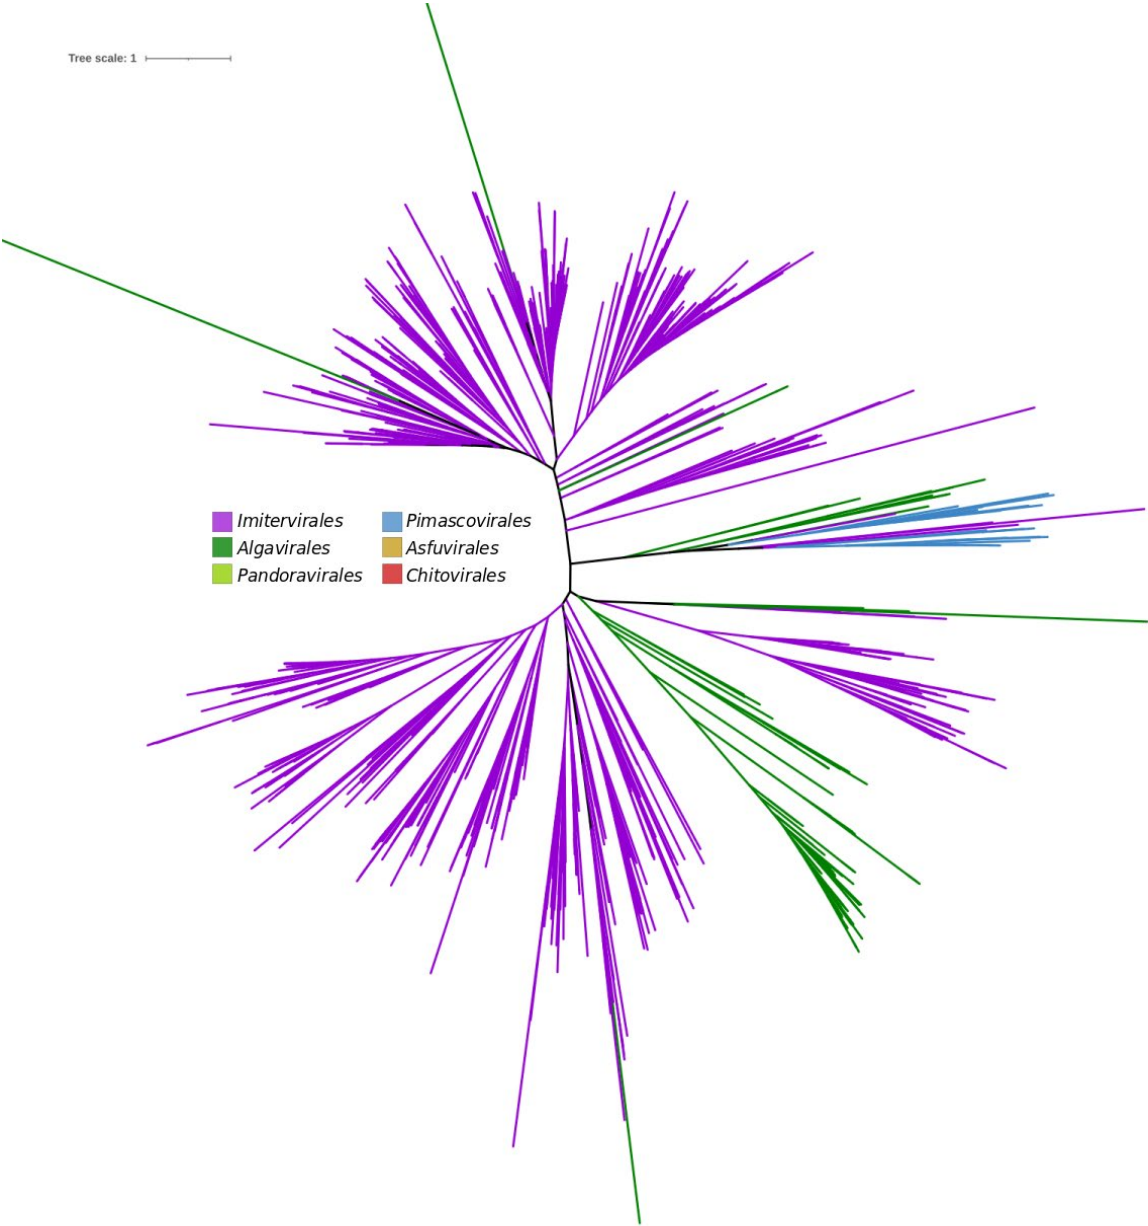

Figure O. Transcription initiation factor IIB GVOGm0172 phylogeny.

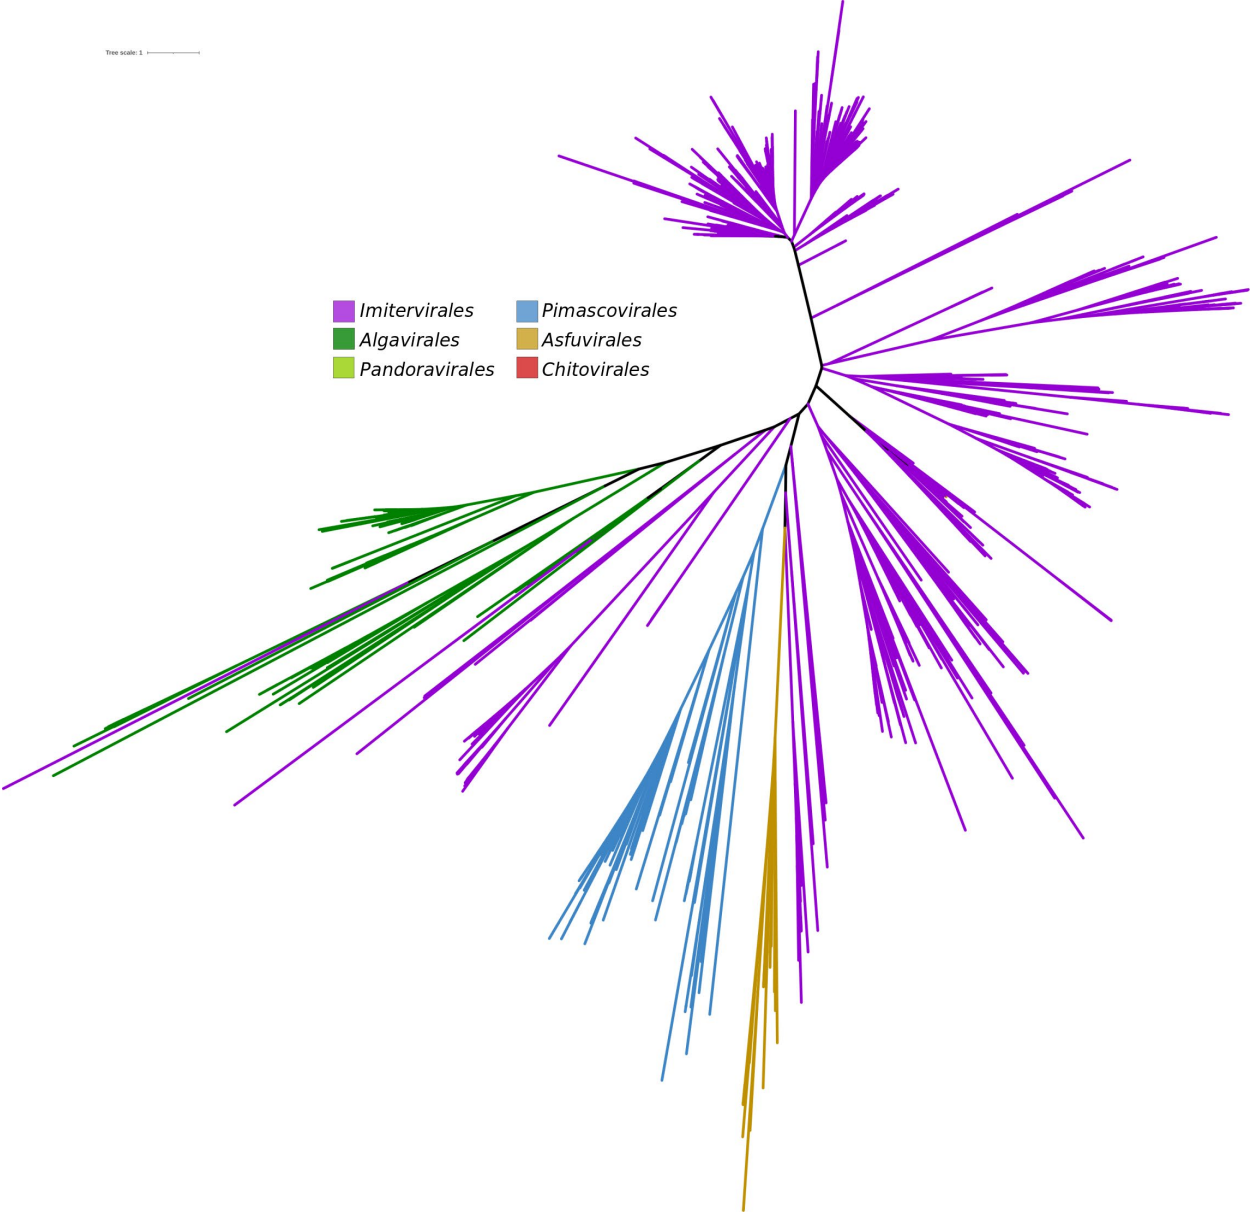

Figure P. RuvC, Holliday junction resolvases (HJRs) GVOGm0189 phylogeny.

Tree scale: 1

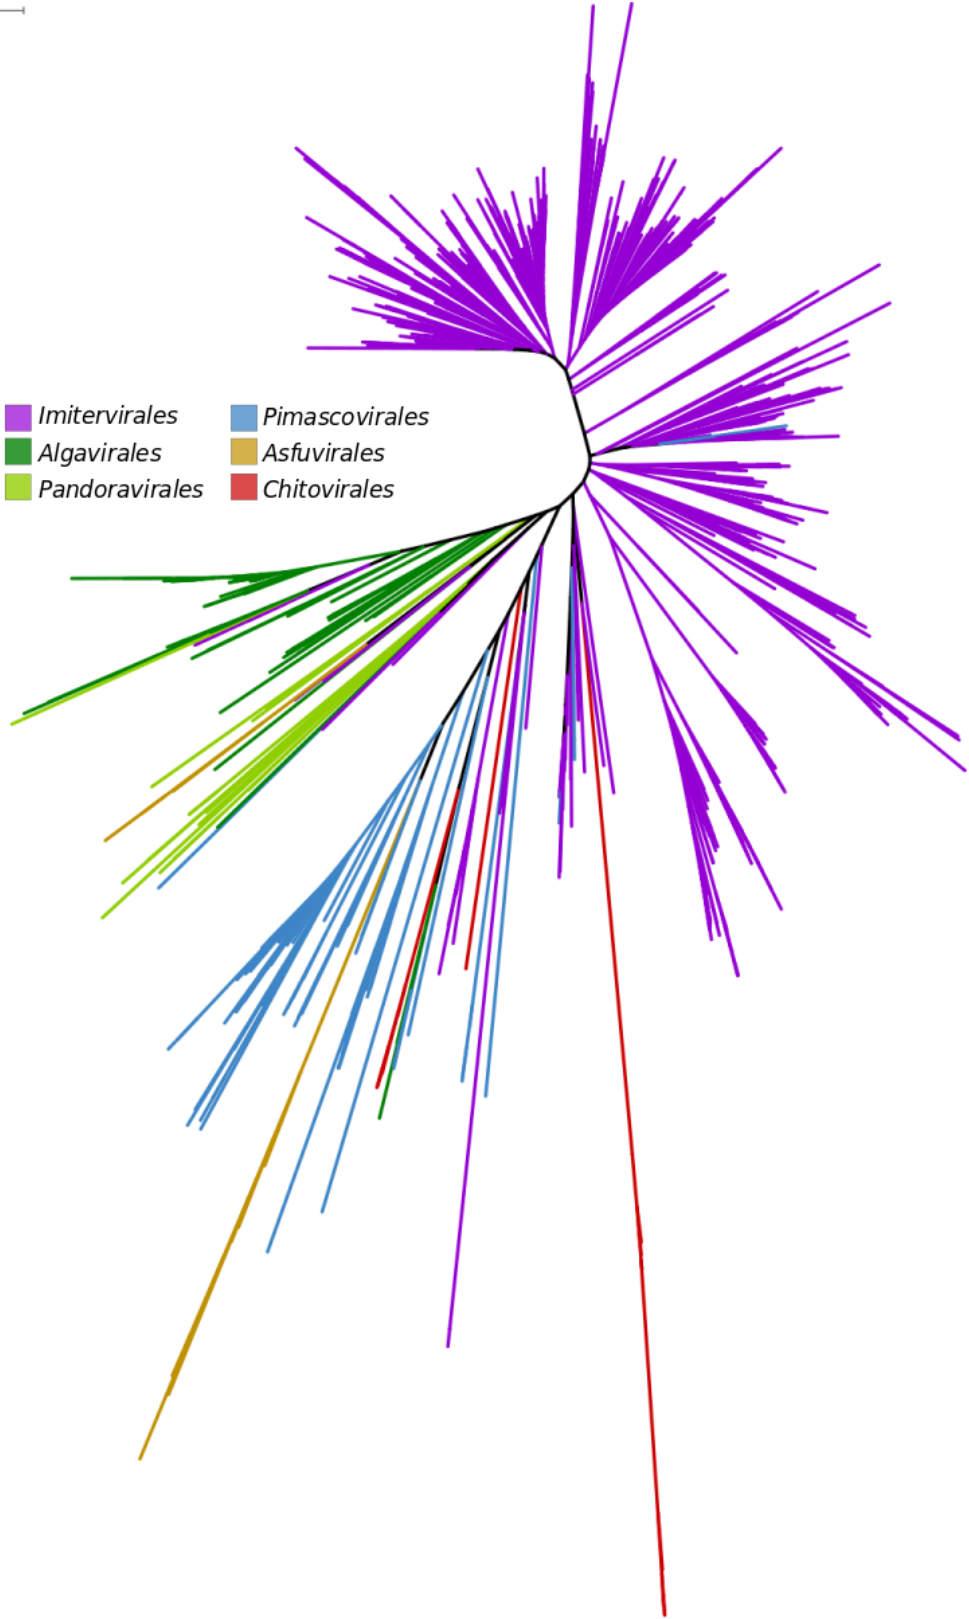

Figure Q. Ubiquitin carboxyl-terminal hydrolase GVOGm0214 phylogeny.

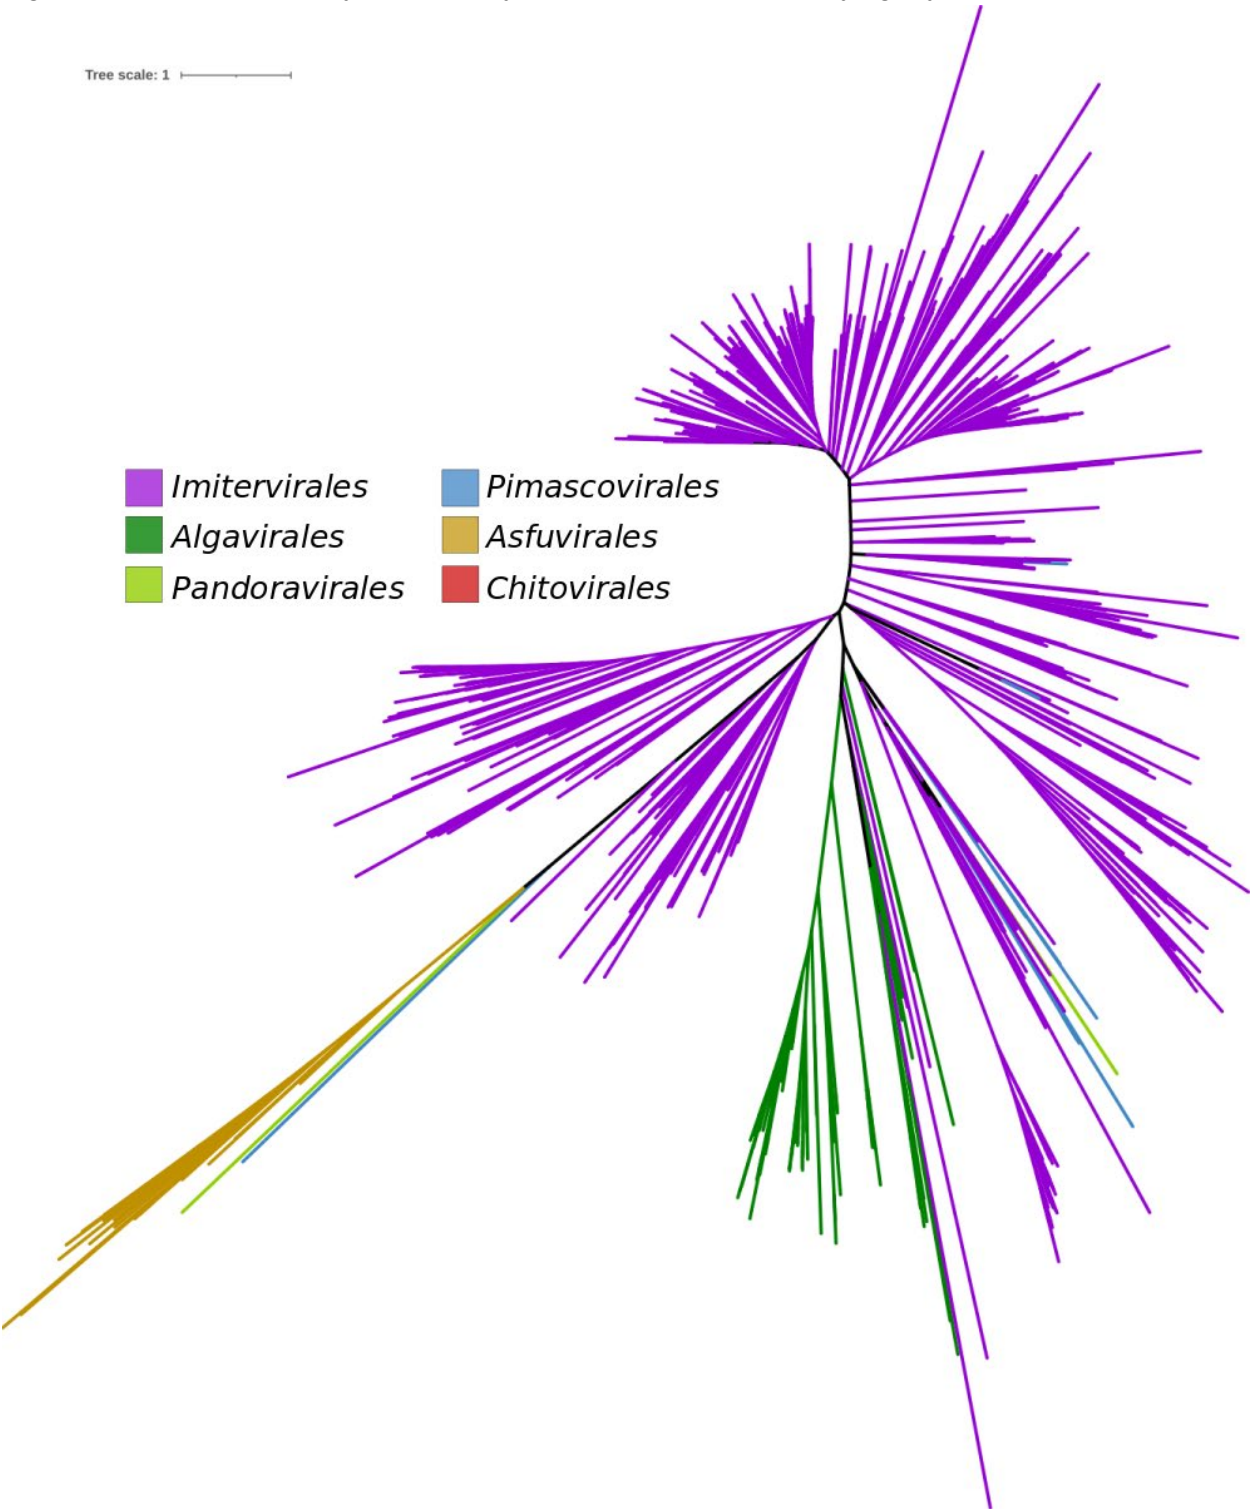



Figure R. Proliferating cell nuclear antigen GVOGm0239 phylogeny.

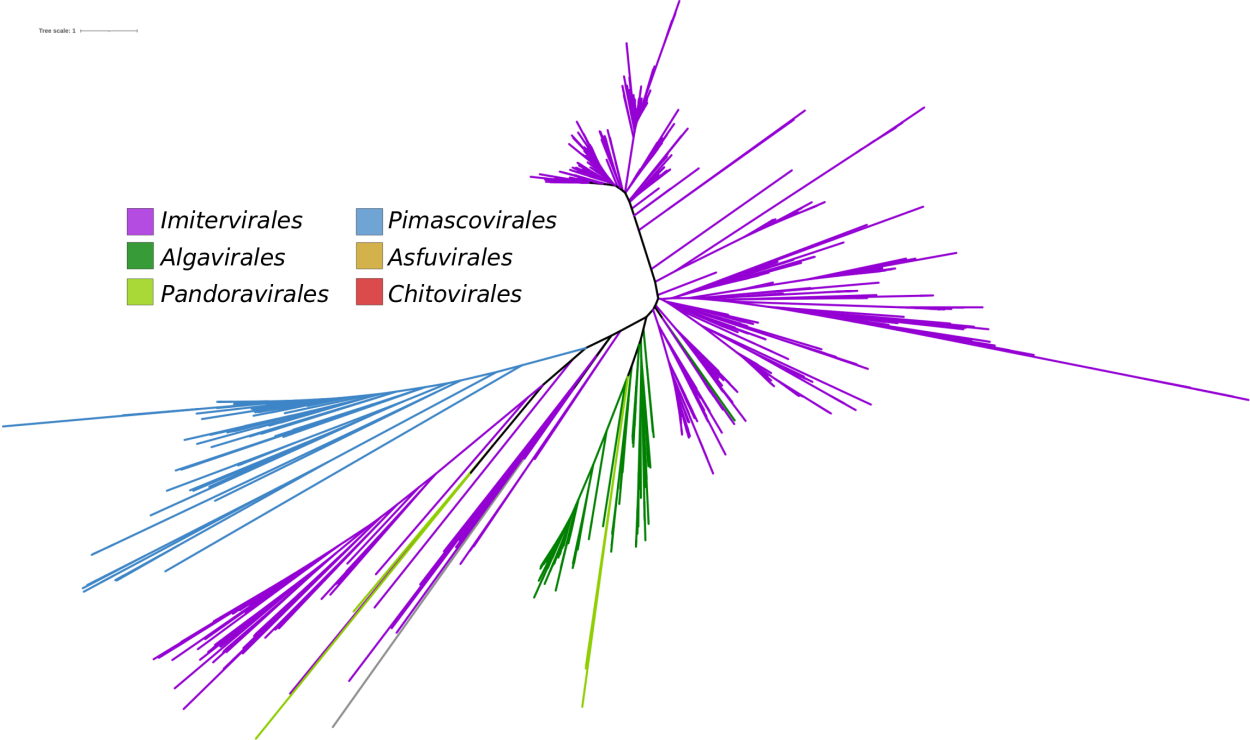

Figure S. DNA topoisomerase II GVOGm0461 phylogeny.

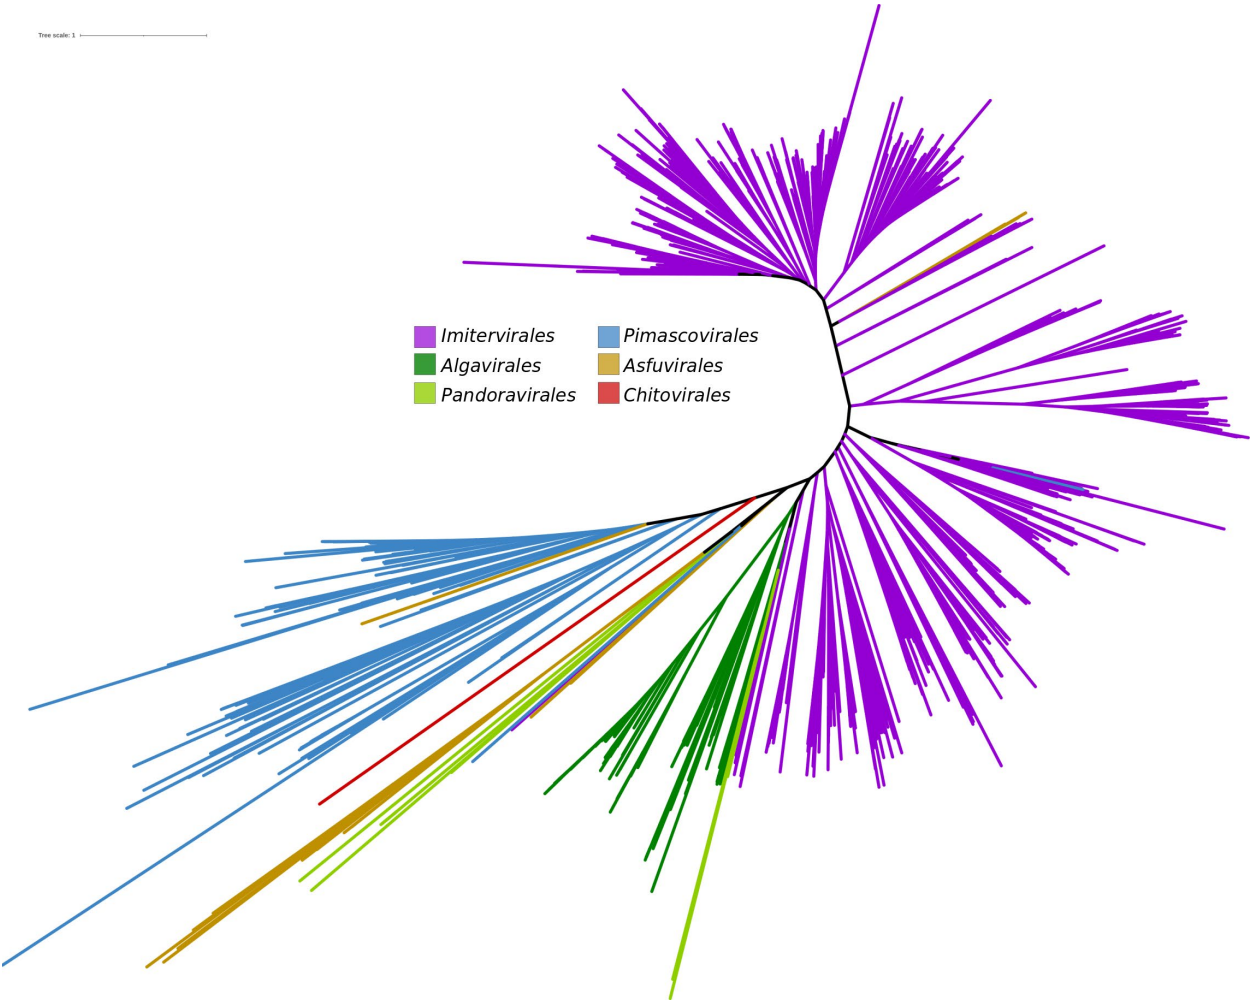



Figure T. Divergent DNA-directed RNA polymerase subunit 5 GVOGm0694 phylogeny.

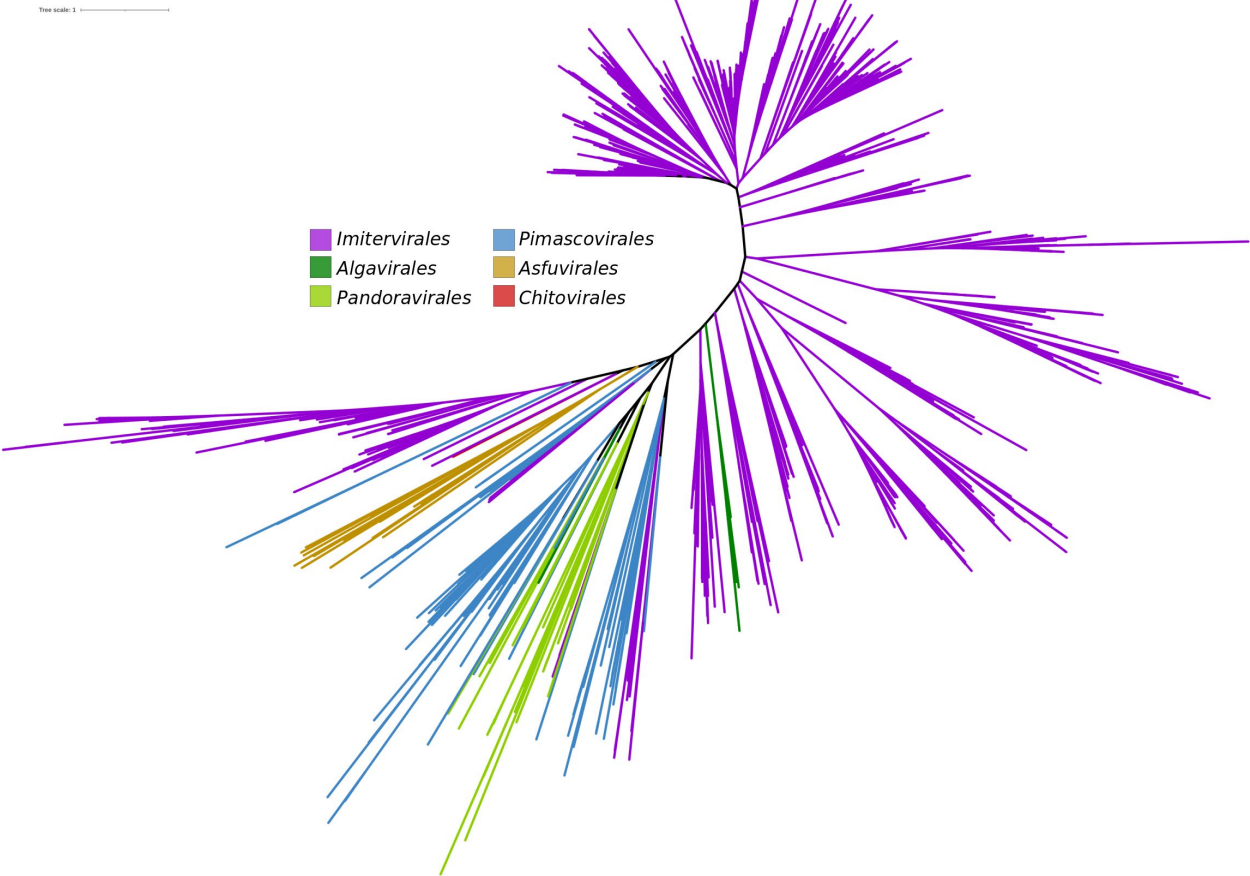

Figure U. Packaging ATPase GVOGm0760 phylogeny.

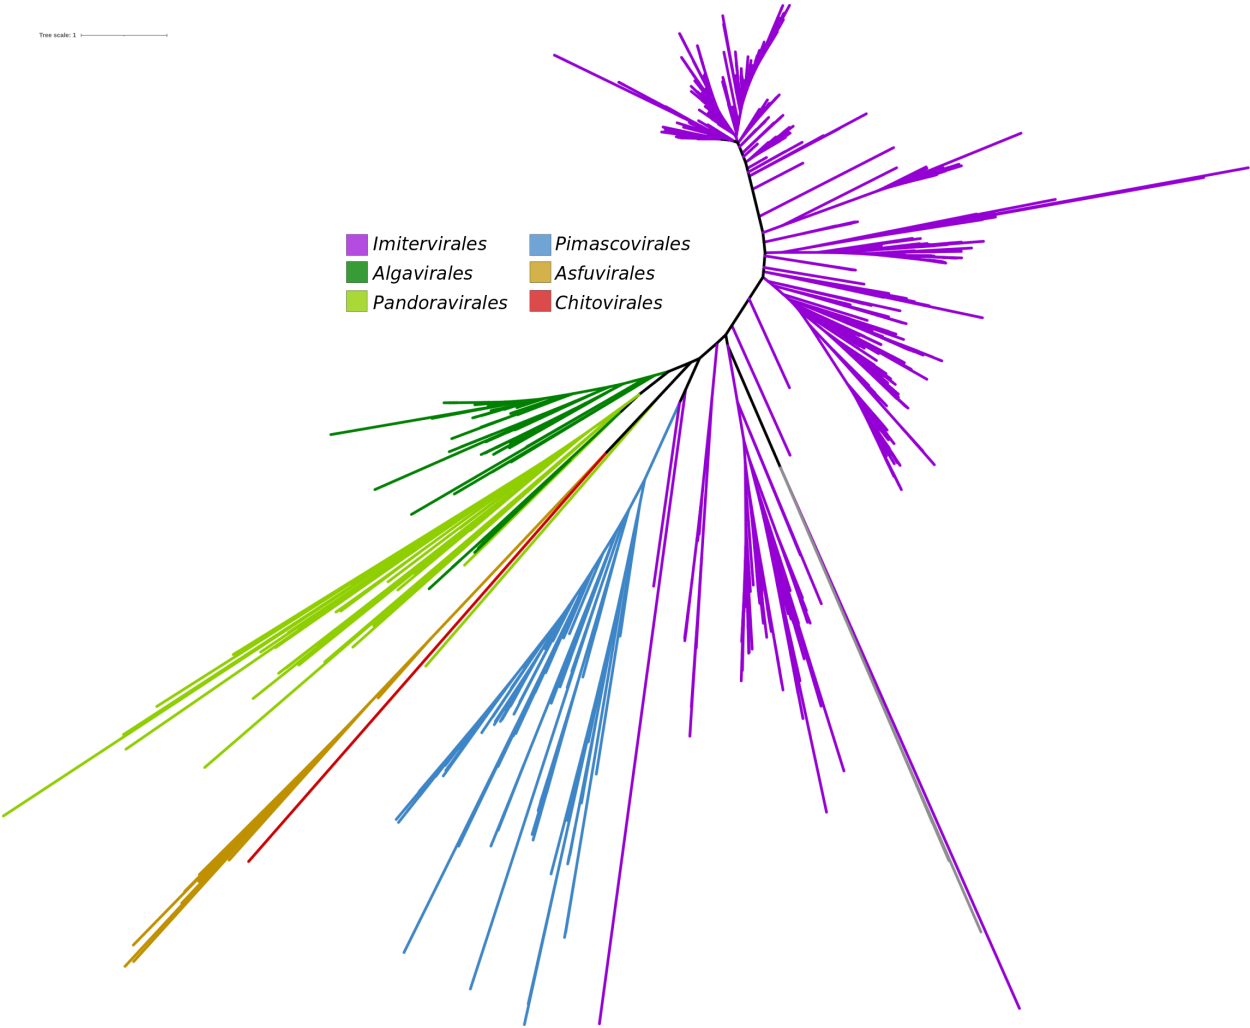

Figure V. Metallopeptidase WLM GVOGm0787 phylogeny.

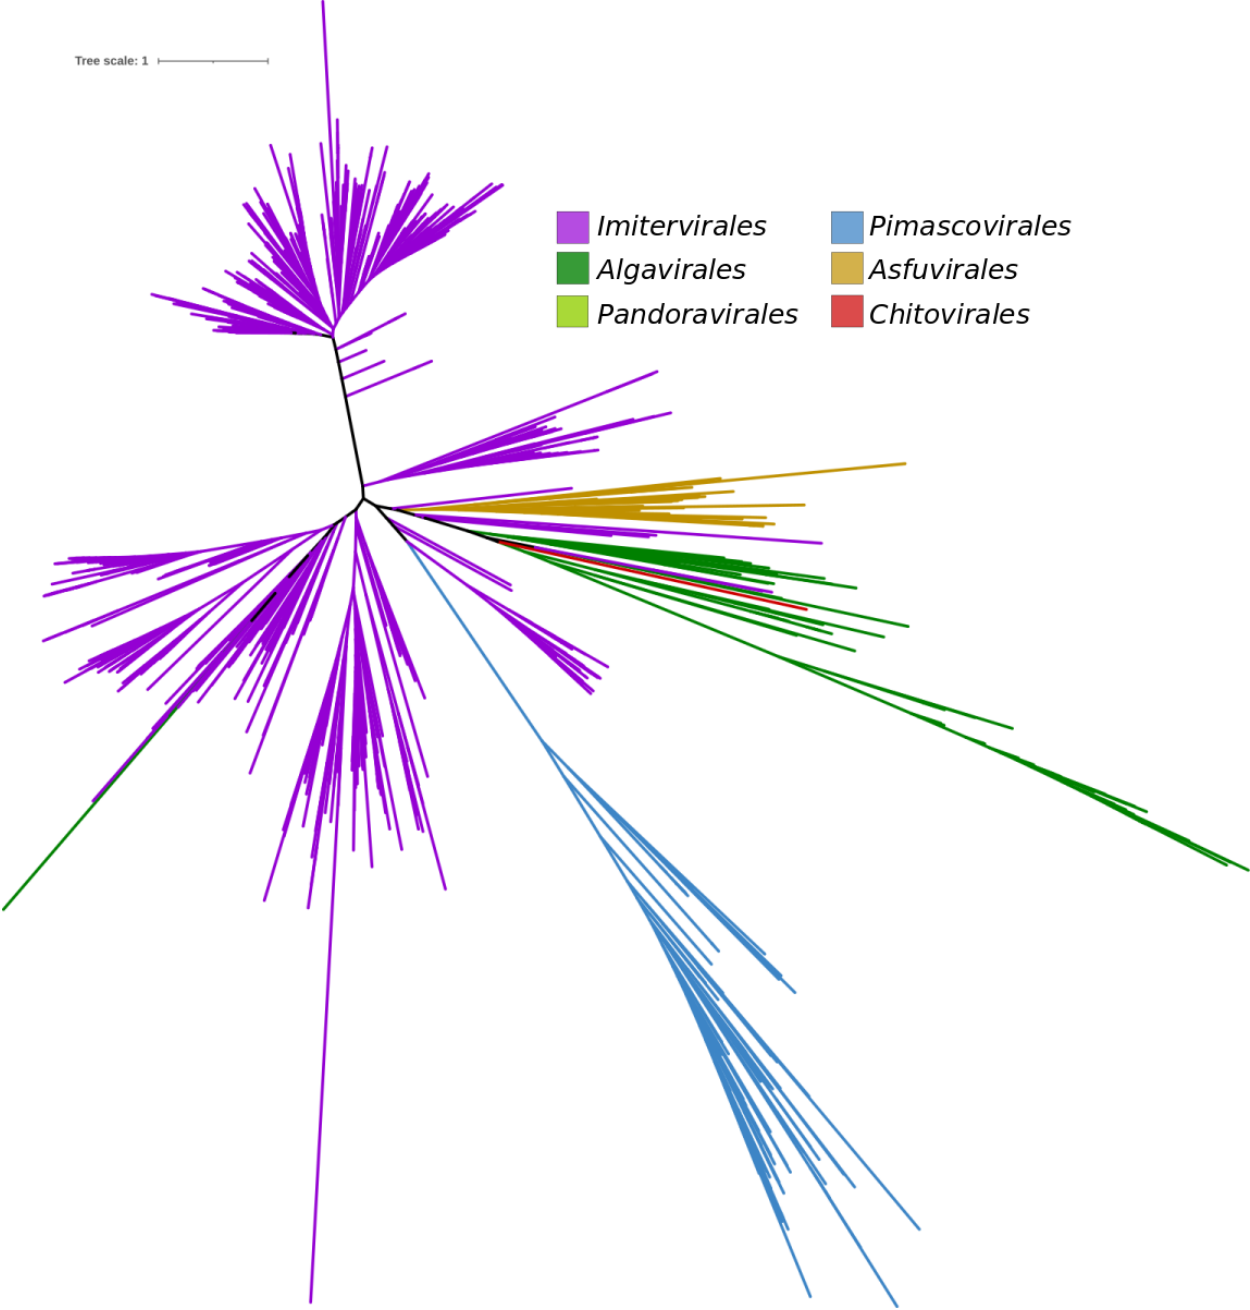

Figure W. Ribonuclease III GVOGm0798 phylogeny.

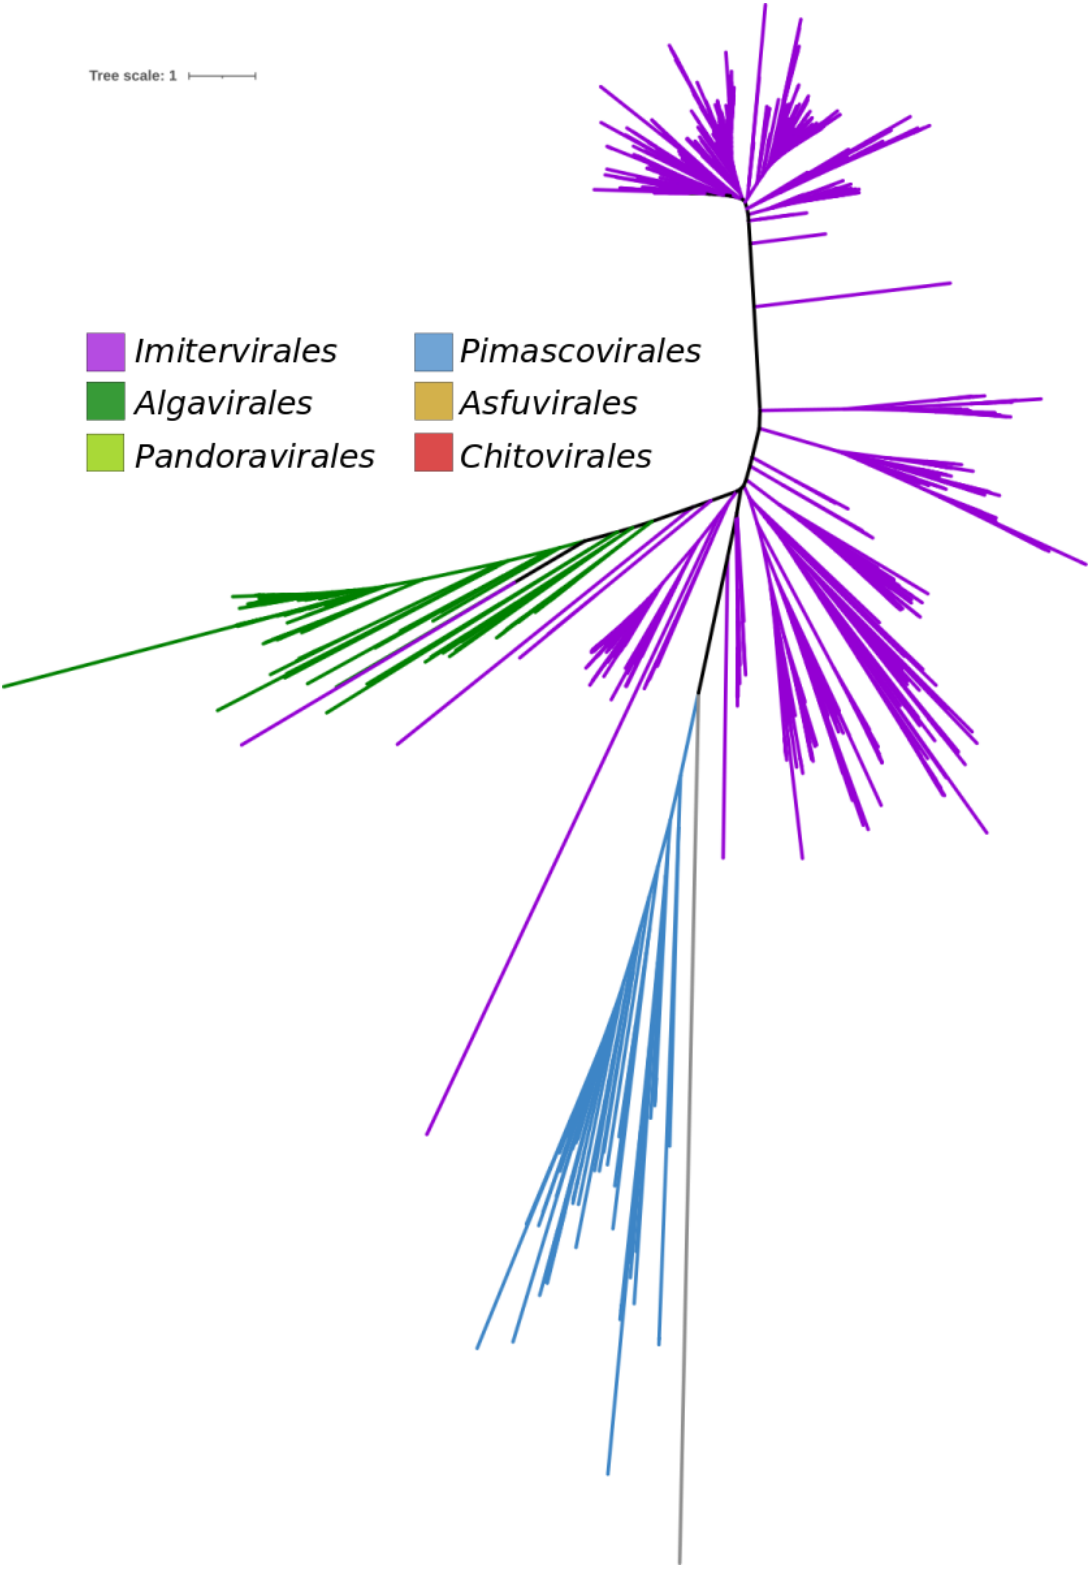

Figure X. Virus Late Transcription Factor 3 VLTF3 GVOGm0890 phylogeny.

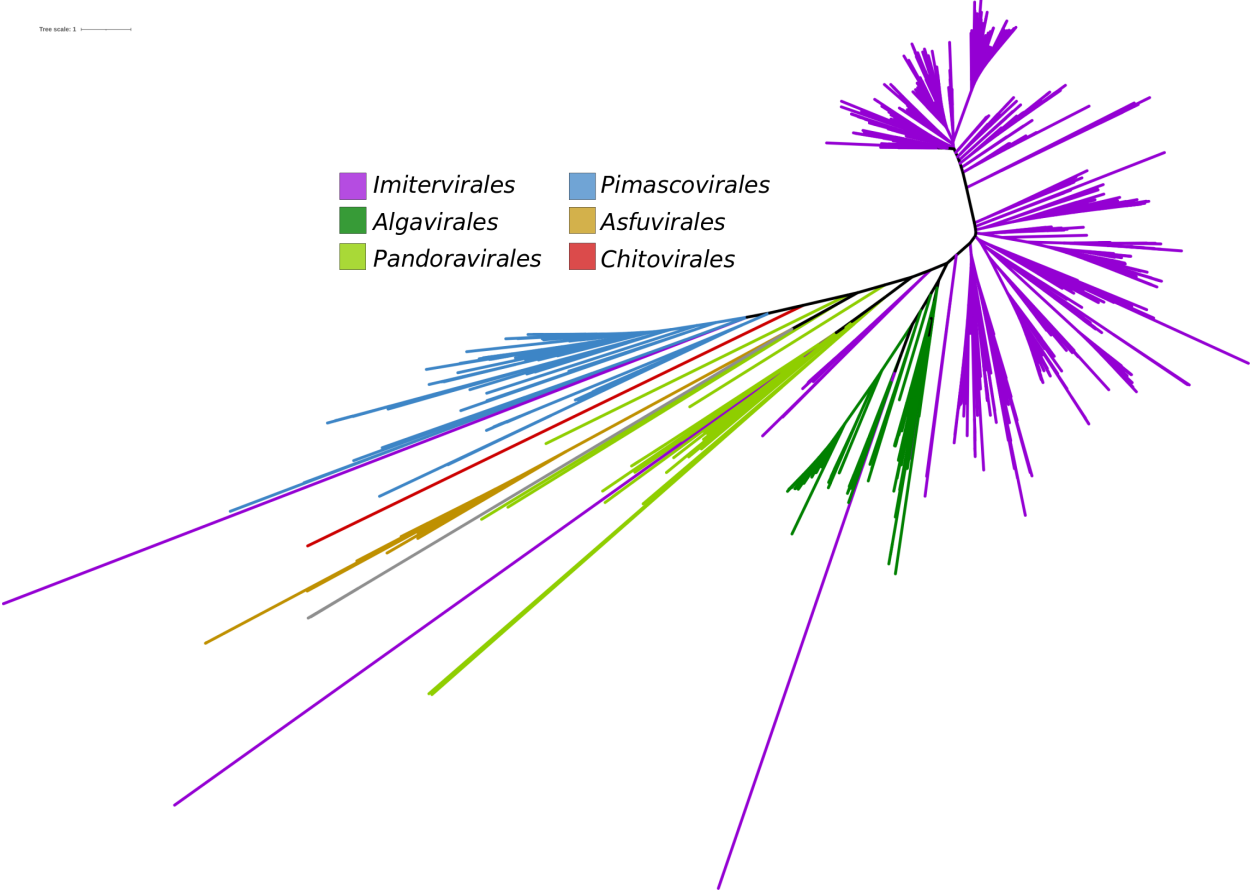

Figure Y. Ribonucleotide reductase small subunit GVOGm1574 phylogeny.

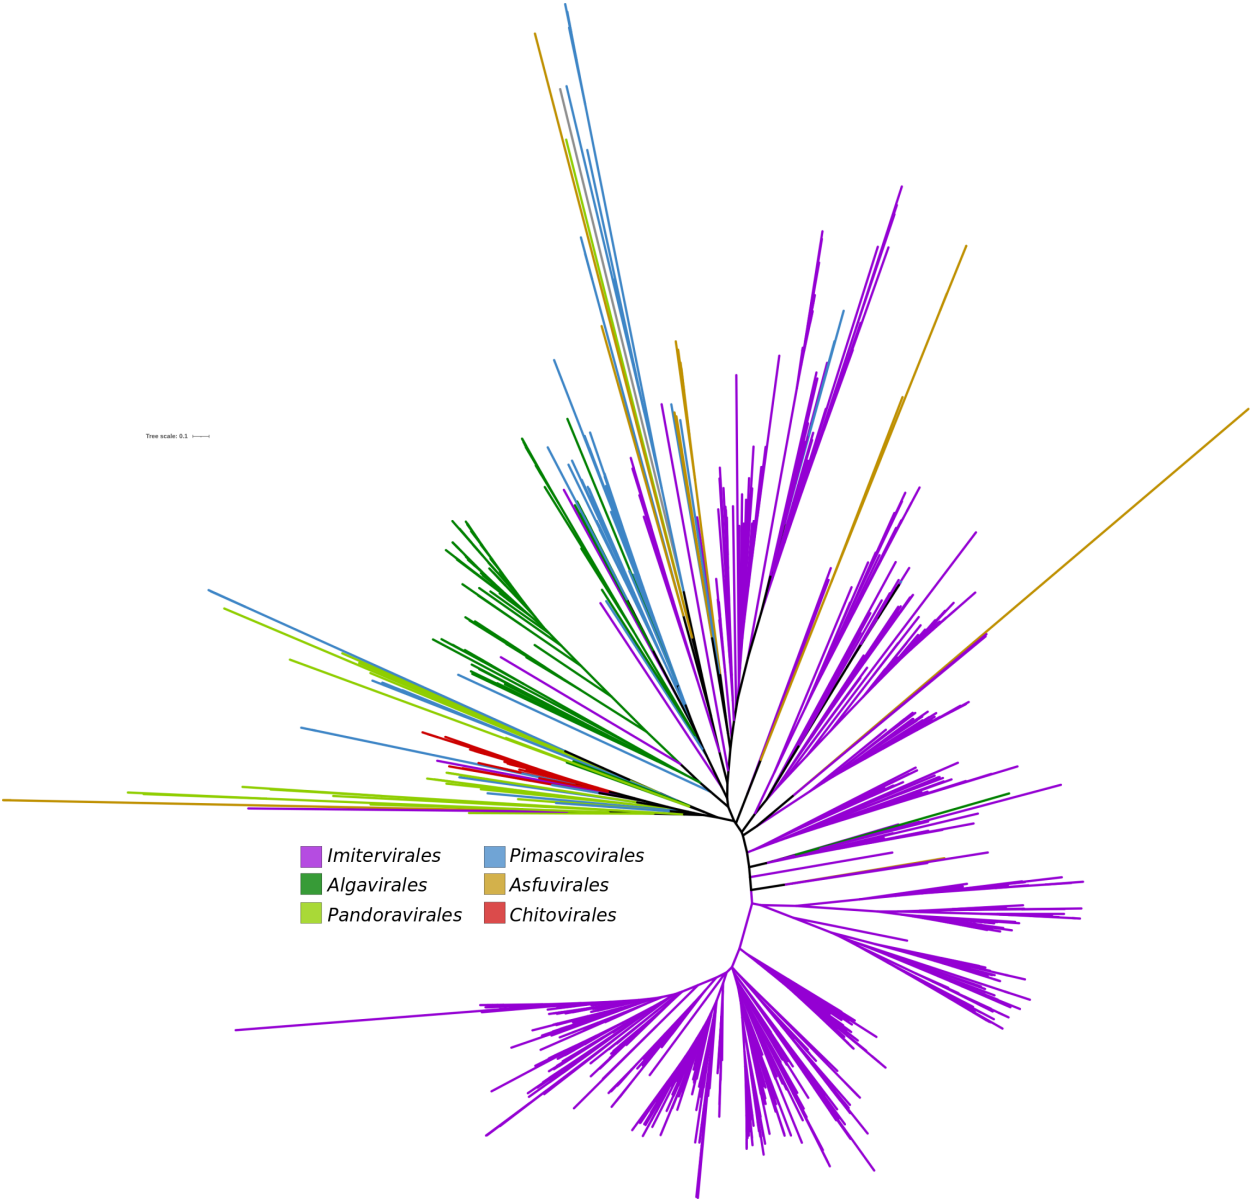

Figure Z. Barchart of source habitats for the *Nucleocytoviricota* families. Full information is provided in S1 Data.

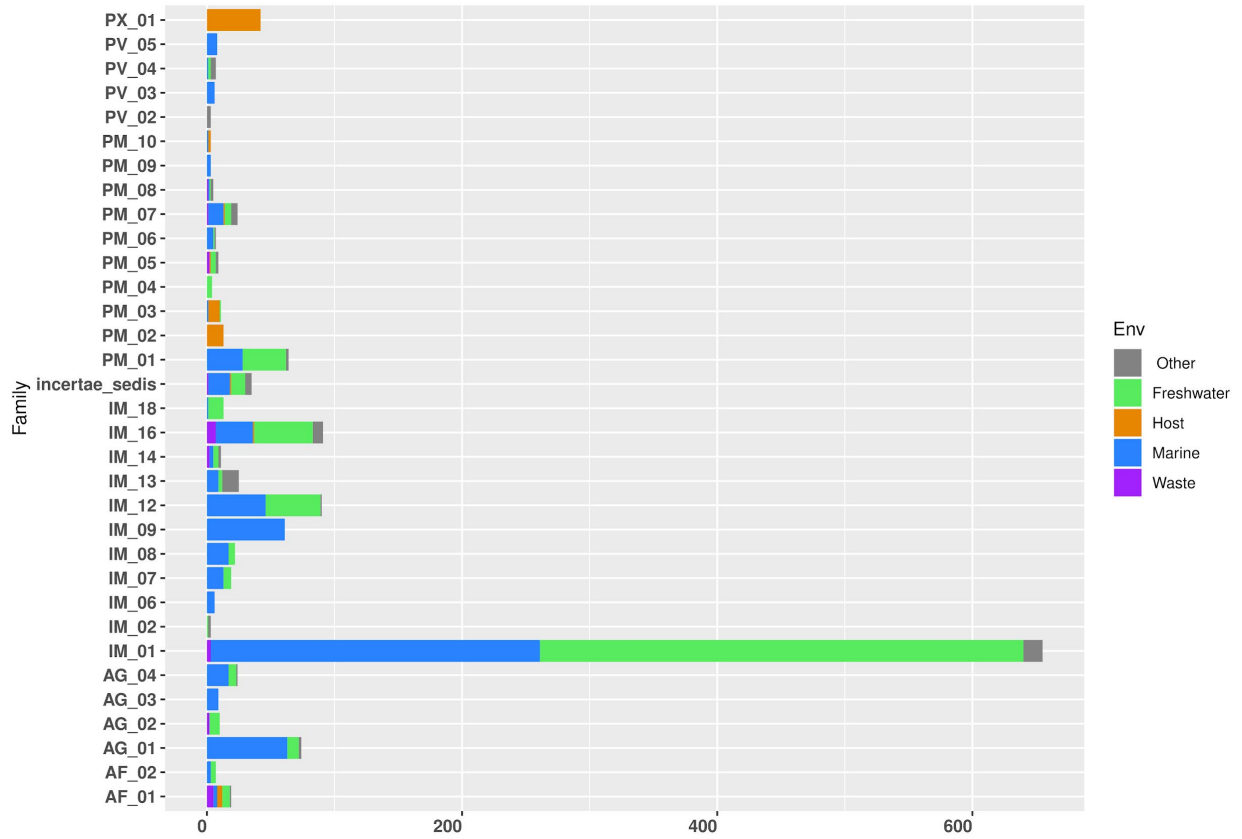

Supplement: pbio.3001430.s001.pdf [file pbio.3001430.s001.pdf]
