# Supplementary material for: A phylogenomic framework for charting the diversity and evolution of giant viruses
Source: PLoS Biol. 2021 Oct 27;19(10):e3001430. doi: 10.1371/journal.pbio.3001430 (PMC8575486; doi:10.1371/journal.pbio.3001430)
Supplement: S3 Data — (XLSX) [file pbio.3001430.s004.xlsx]

## Sheet: class_RED
Name	Level	RED
Pokkesviricetes	class	0.0195263
Megaviricetes	class	0.0355075
Pimascovirales	order	0.0896084
Pandoravirales	order	0.149715
Chitovirales	order	0.150766
Imitervirales	order	0.185329
Algavirales	order	0.188159
Asfuvirales	order	0.248835
PM_07	family	0.330294
AG_04	family	0.332055
IM_18	family	0.33221
PV_03	family	0.332649
PM_08	family	0.338035
AG_03	family	0.344248
PV_05	family	0.350392
IM_14	family	0.36307
PM_04	family	0.382735
PM_01	family	0.397198
IM_16	family	0.403115
PM_06	family	0.420097
PM_05	family	0.424408
IM_01	family	0.432658
IM_13	family	0.433678
IM_09	family	0.455362
IM_12	family	0.456359
PM_02	family	0.459393
IM_08	family	0.472569
PM_09	family	0.486868
PV_04	family	0.488788
IM_07	family	0.492634
PX_01	family	0.523081
PM_03	family	0.524831
AG_01	family	0.525813
AF_02	family	0.534134
AF_01	family	0.536986
AG_02	family	0.543693
IM_06	family	0.578254
IM_02	family	0.594535
PV_02	family	0.620076
g288	genus	0.69147
g334	genus	0.694073
g329	genus	0.696572
g310	genus	0.702855
g291	genus	0.706944
g340	genus	0.714974
g297	genus	0.717298
g292	genus	0.719309
g344	genus	0.719398
g308	genus	0.719722
g327	genus	0.720984
g309	genus	0.724154
g96	genus	0.728888
g341	genus	0.729405
g246	genus	0.732993
g300	genus	0.734316
g343	genus	0.737828
g289	genus	0.739496
g338	genus	0.740793
g298	genus	0.742011
g339	genus	0.742413
g275	genus	0.744759
g326	genus	0.748127
g200	genus	0.750582
g263	genus	0.752002
g258	genus	0.752658
g233	genus	0.754646
g239	genus	0.754791
g236	genus	0.756617
g342	genus	0.757809
g232	genus	0.759884
g314	genus	0.763616
g287	genus	0.766232
g277	genus	0.768503
g336	genus	0.771091
g330	genus	0.7742
g279	genus	0.774681
g301	genus	0.775935
g177	genus	0.780362
g273	genus	0.780767
g315	genus	0.780886
g335	genus	0.781473
g316	genus	0.78239
g337	genus	0.783359
g242	genus	0.78357
g220	genus	0.783738
g215	genus	0.789004
g257	genus	0.790192
g105	genus	0.792192
g274	genus	0.792962
g106	genus	0.793358
g322	genus	0.794371
g304	genus	0.794449
g222	genus	0.795388
g103	genus	0.796123
g328	genus	0.796611
g95	genus	0.79742
g109	genus	0.798292
g210	genus	0.802189
g224	genus	0.802691
g299	genus	0.808901
g250	genus	0.816054
g333	genus	0.817788
g226	genus	0.819017
g303	genus	0.819477
g176	genus	0.819906
g219	genus	0.821647
g270	genus	0.825653
g184	genus	0.828087
g173	genus	0.828166
g172	genus	0.828298
g318	genus	0.829032
g276	genus	0.829628
g182	genus	0.832071
g168	genus	0.832882
g132	genus	0.833141
g122	genus	0.833709
g234	genus	0.841291
g117	genus	0.844042
g332	genus	0.846229
g118	genus	0.846726
g87	genus	0.846809
g323	genus	0.846927
g284	genus	0.850591
g107	genus	0.851618
g271	genus	0.852253
g51	genus	0.854942
g85	genus	0.861467
g345	genus	0.866938
g68	genus	0.878605
g175	genus	0.87939
g223	genus	0.880425
g127	genus	0.883848
g319	genus	0.88721
g77	genus	0.890561
g141	genus	0.891495
g61	genus	0.896017
g317	genus	0.89631
g278	genus	0.90031
g86	genus	0.901263
g6	genus	0.903813
g214	genus	0.904667
g213	genus	0.907723
g259	genus	0.908751
g24	genus	0.908755
g283	genus	0.910508
g114	genus	0.911474
g125	genus	0.911769
g296	genus	0.913409
g36	genus	0.918846
g9	genus	0.919532
g295	genus	0.920153
g52	genus	0.926208
g331	genus	0.92814
g60	genus	0.928732
g123	genus	0.931828
g178	genus	0.938592
g320	genus	0.939818
g260	genus	0.941832
g1	genus	0.943279
g183	genus	0.952596
g181	genus	0.954856
g2	genus	0.958748
g22	genus	0.969393
g66	genus	0.974676
g151	genus	0.977149
g198	genus	0.978375
g3	genus	0.986267
g7	genus	0.990405
g126	genus	0.995368
g26	genus	0.995894
